# Supplementary material for: PLCD3 promotes malignant cell behaviors in esophageal squamous cell carcinoma via the PI3K/AKT/P21 signaling
Source: Springer Nature journal article supplement (doi:10.1186/s12885-023-11409-w), 2023-09-29

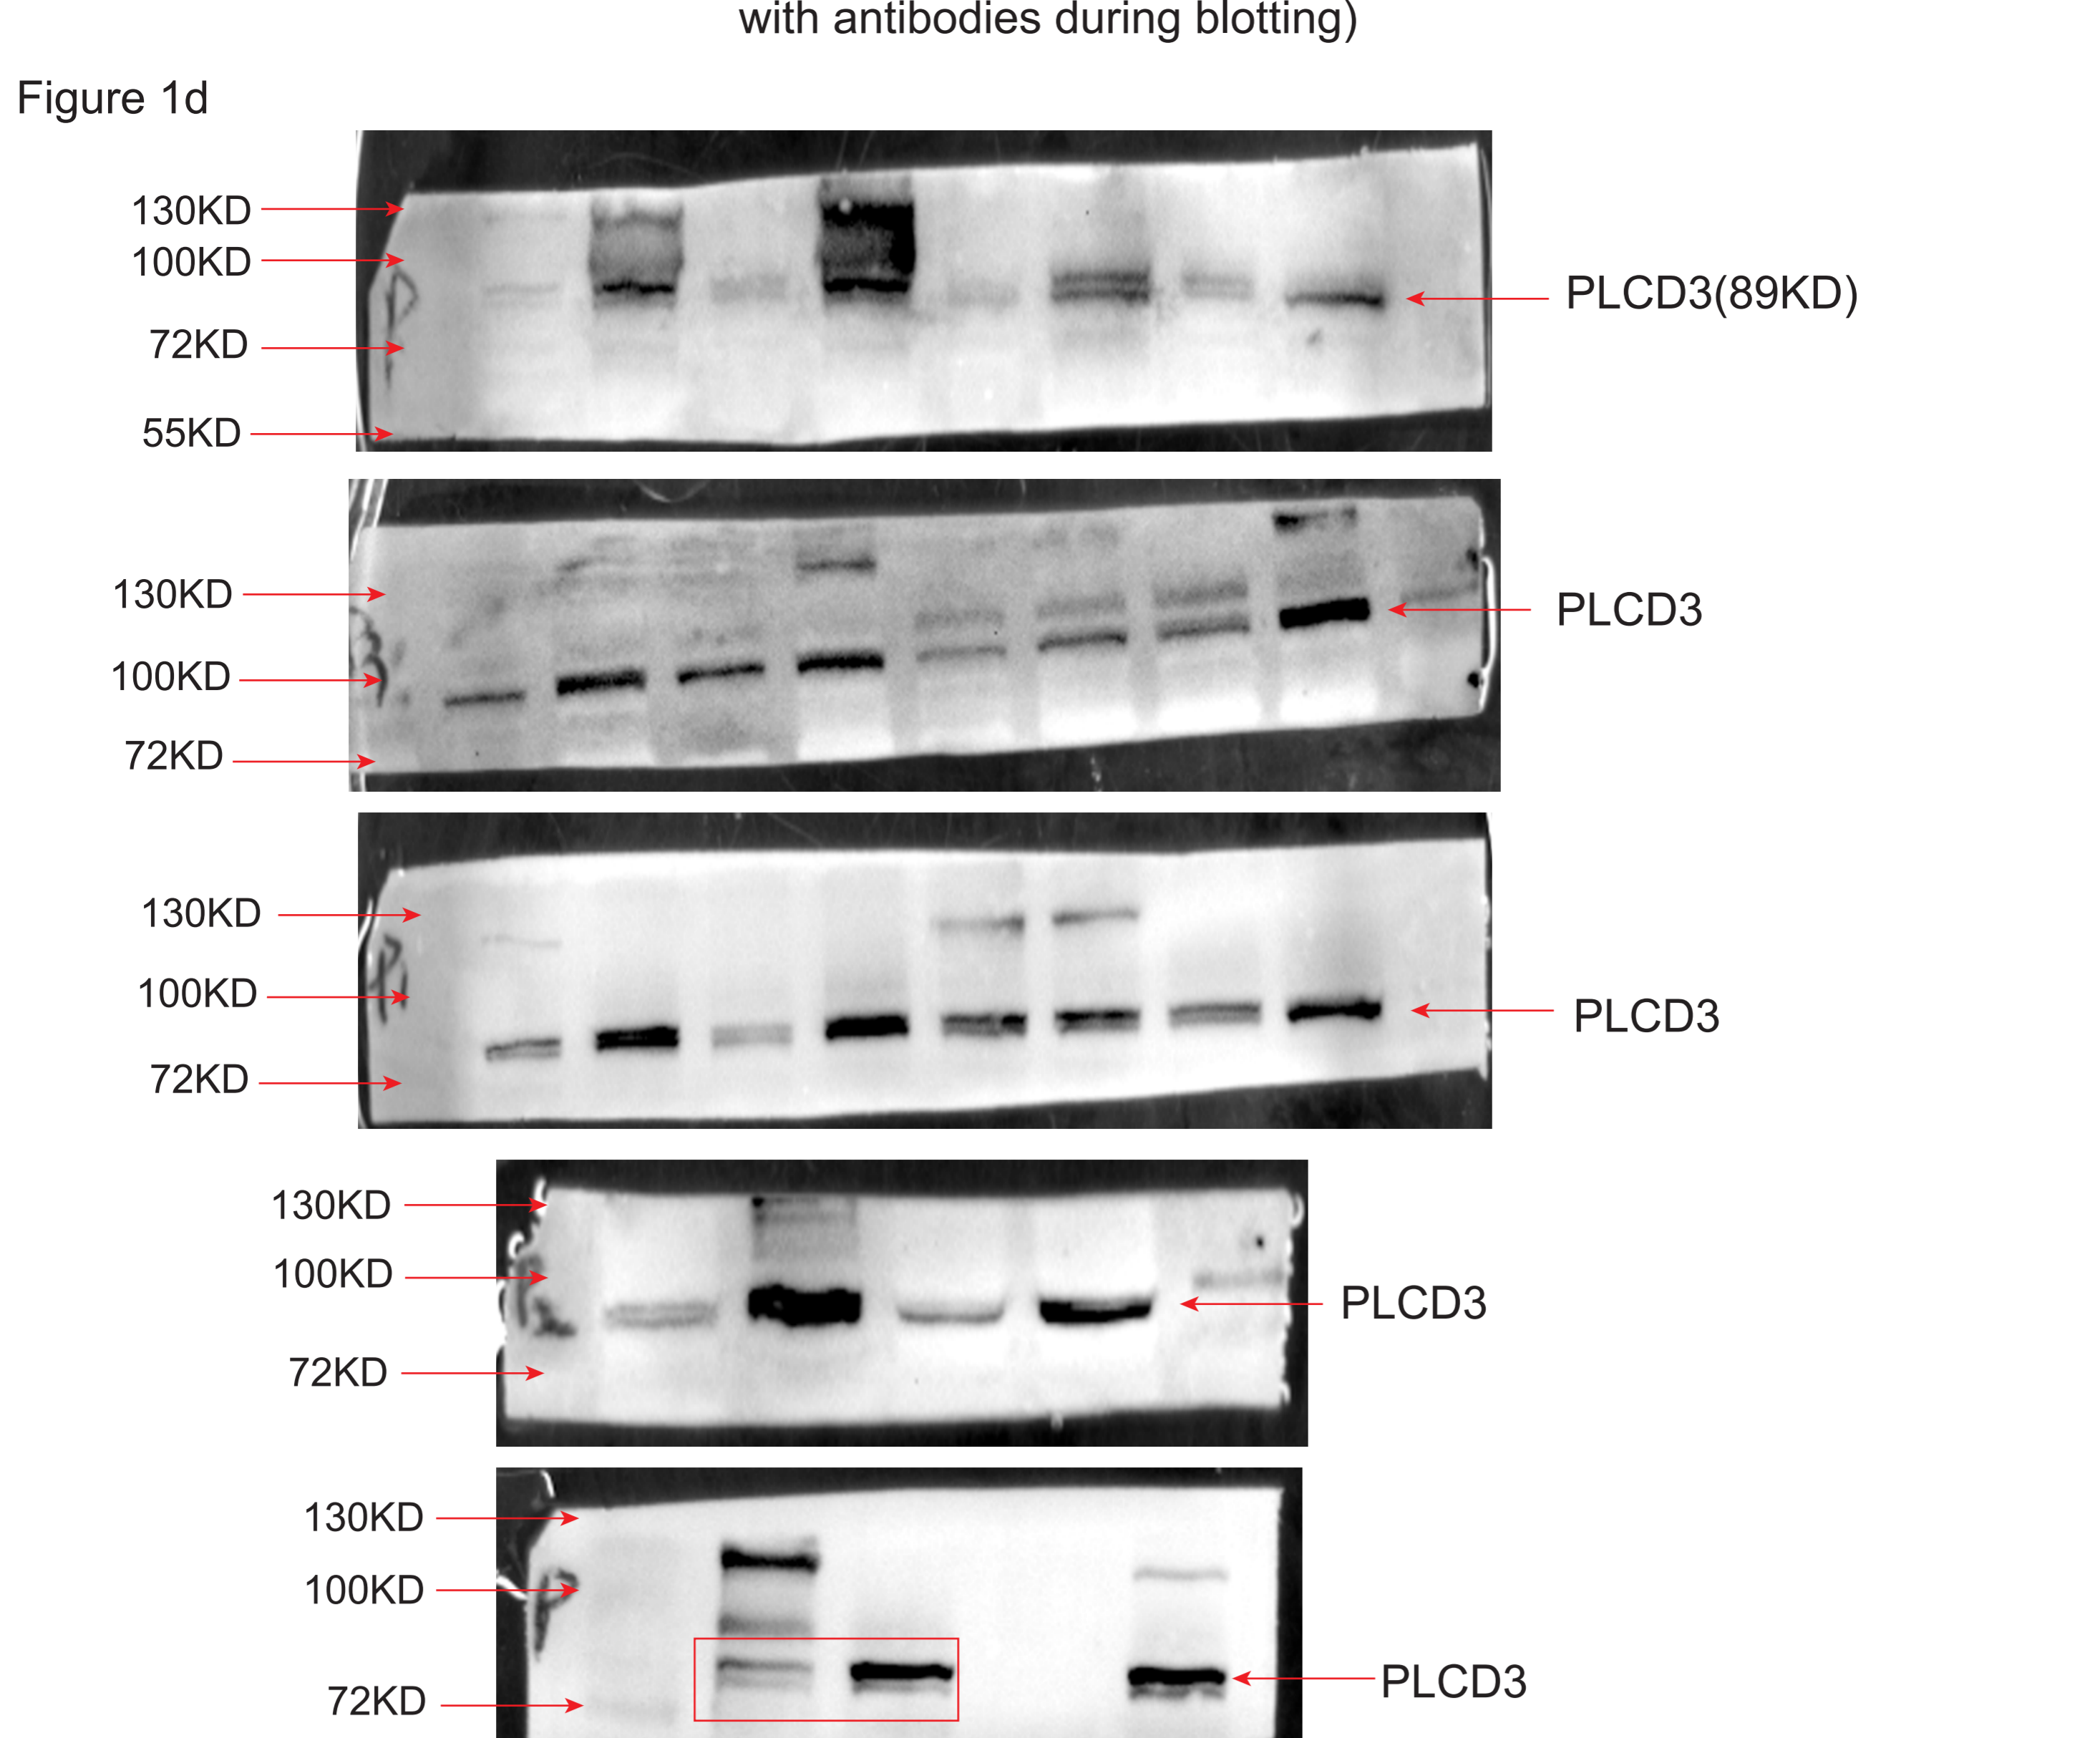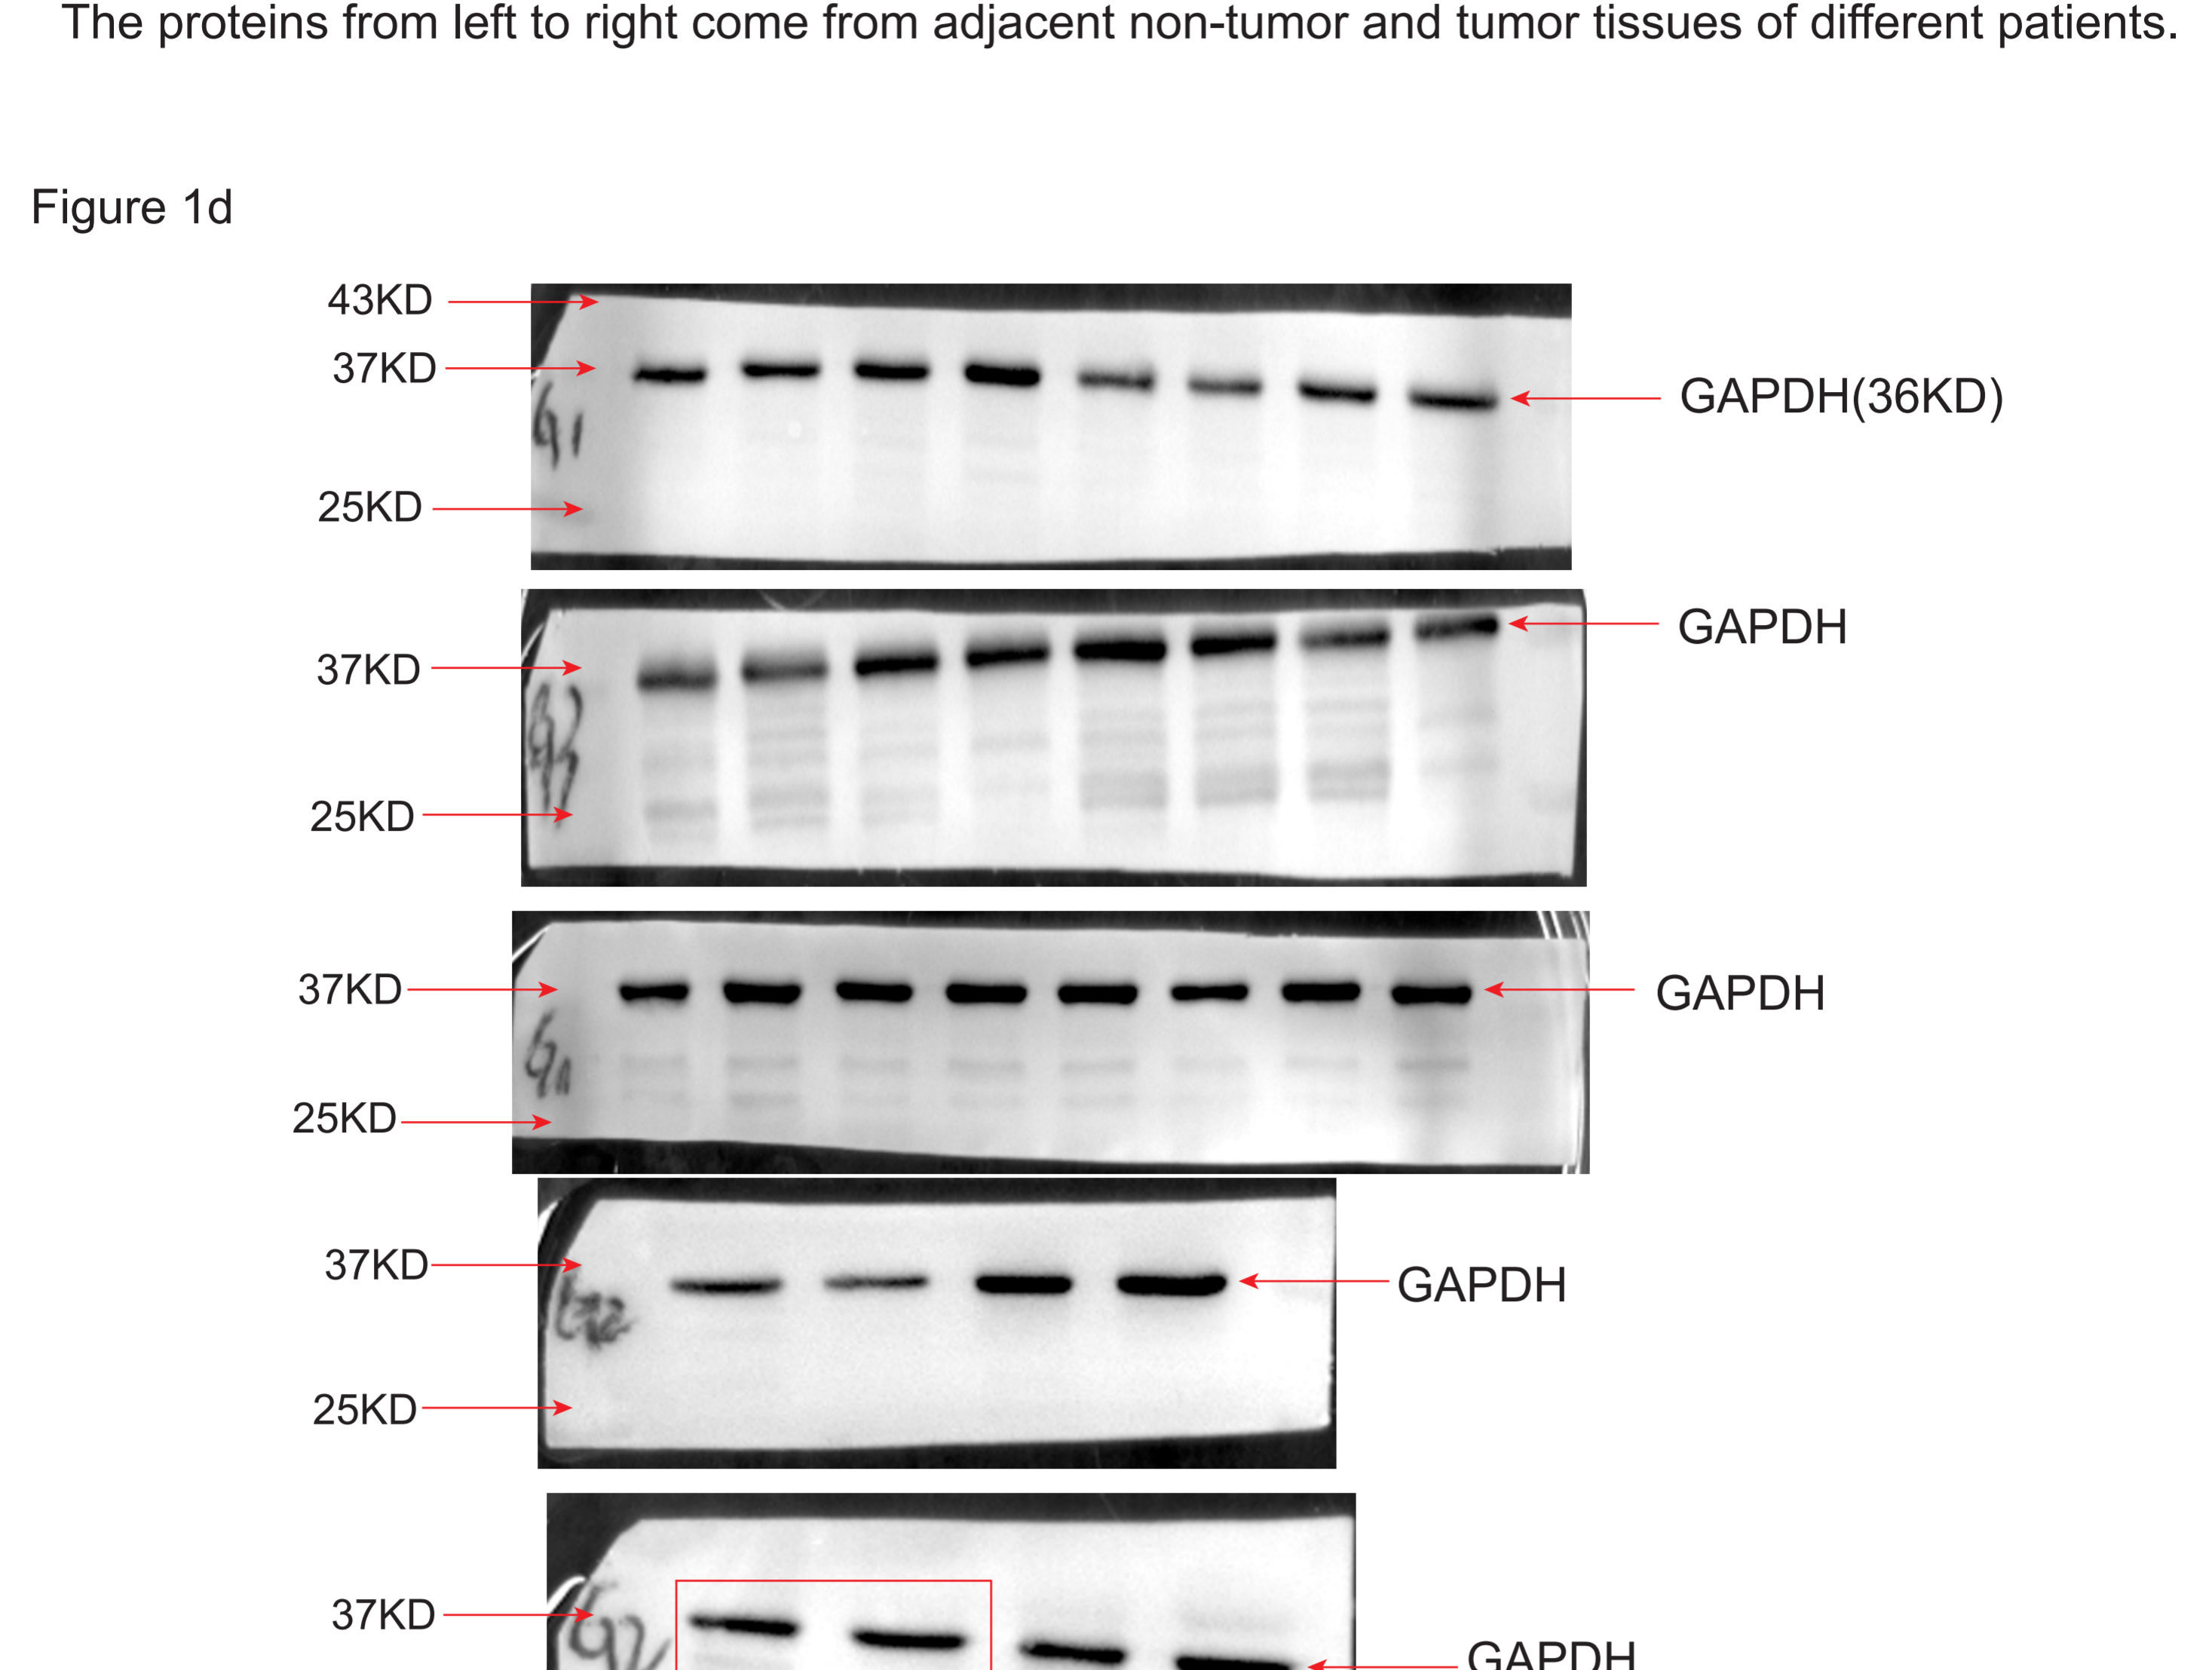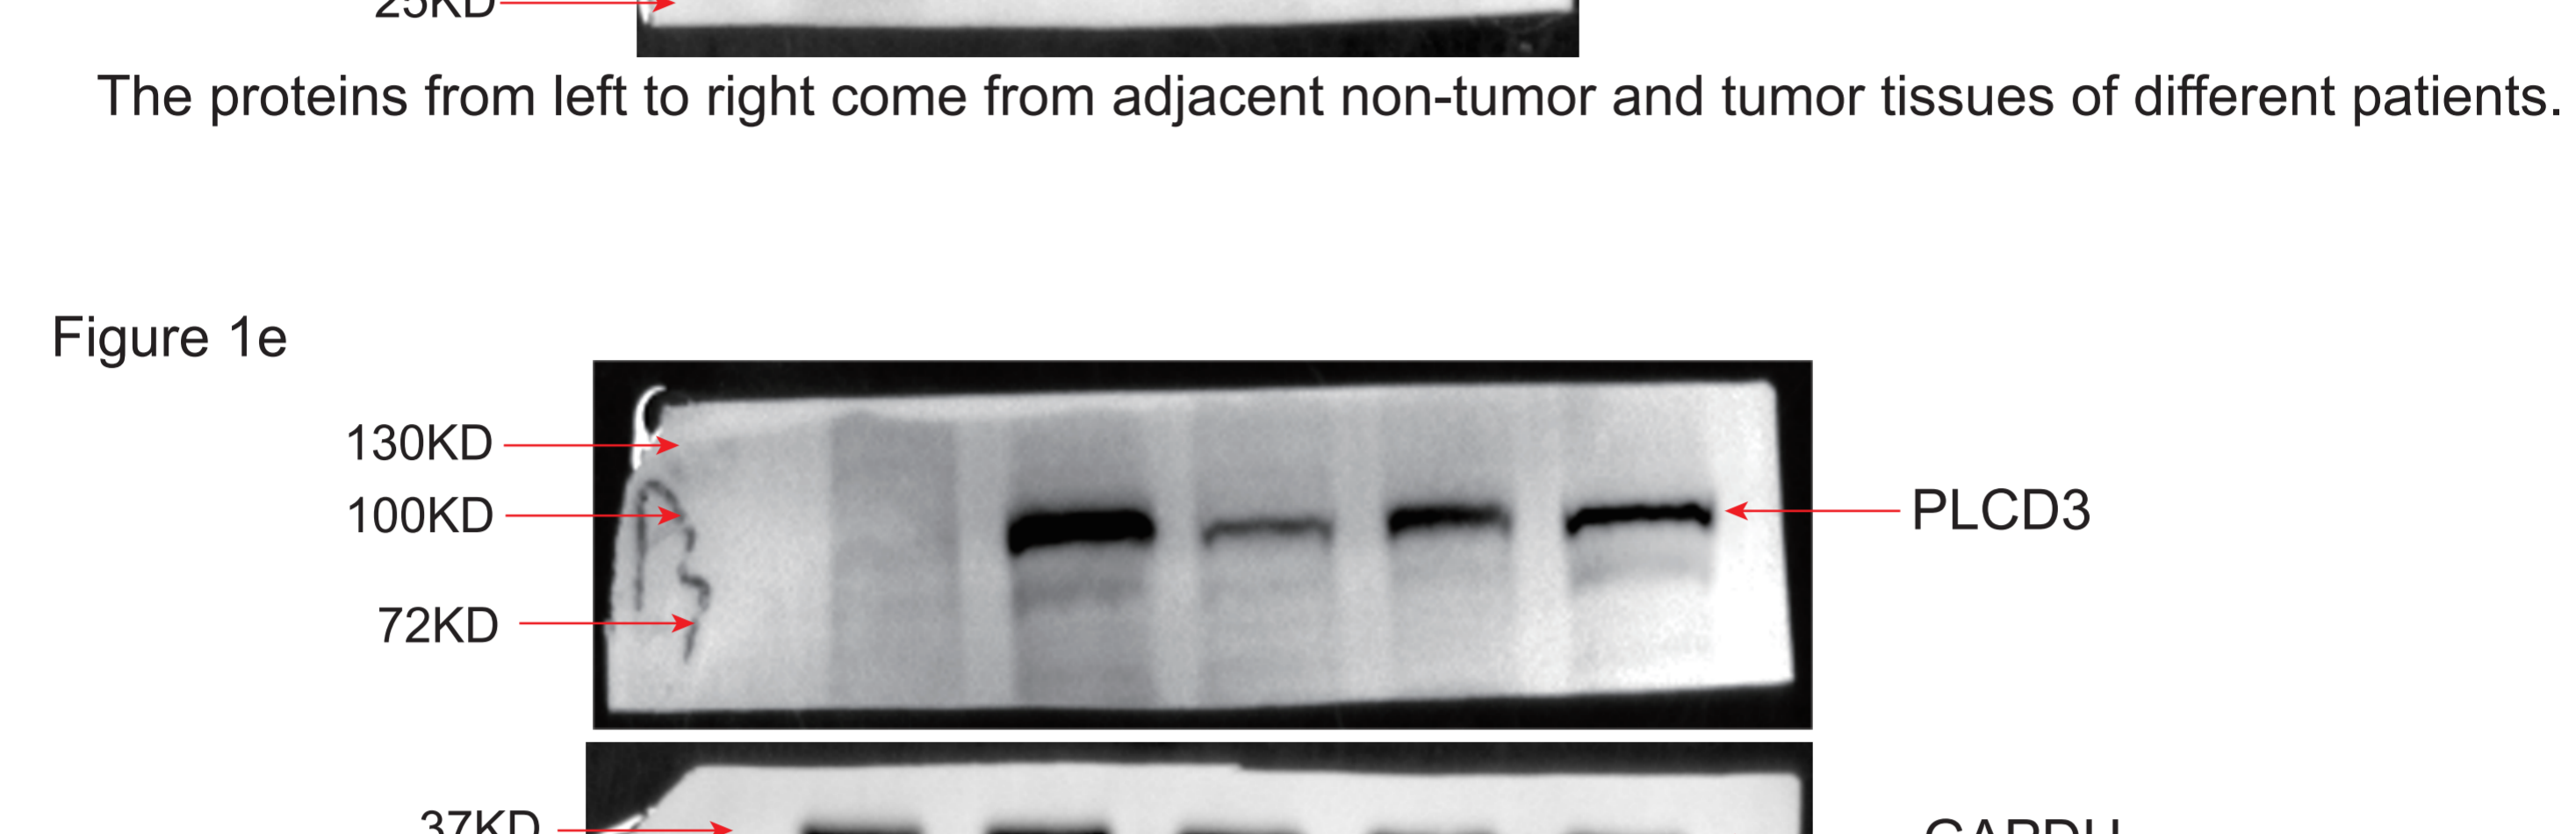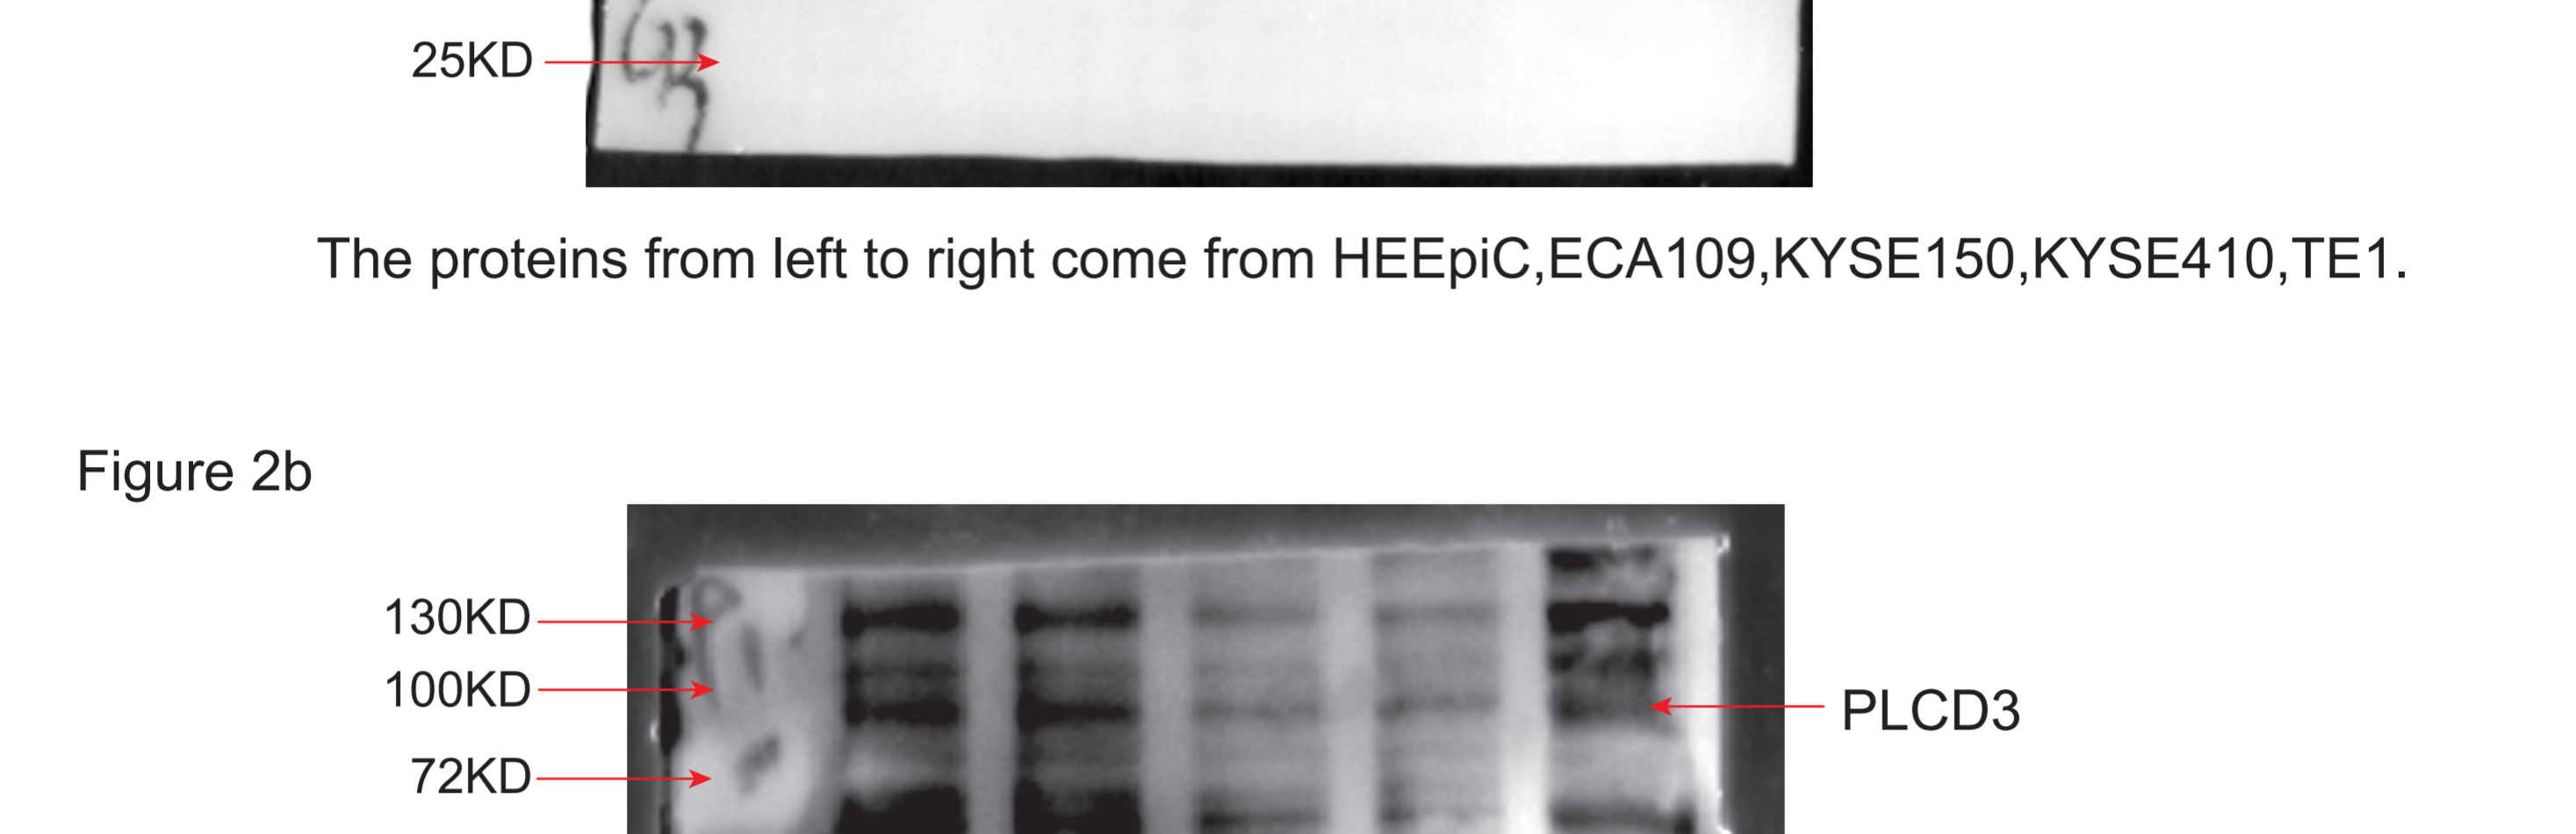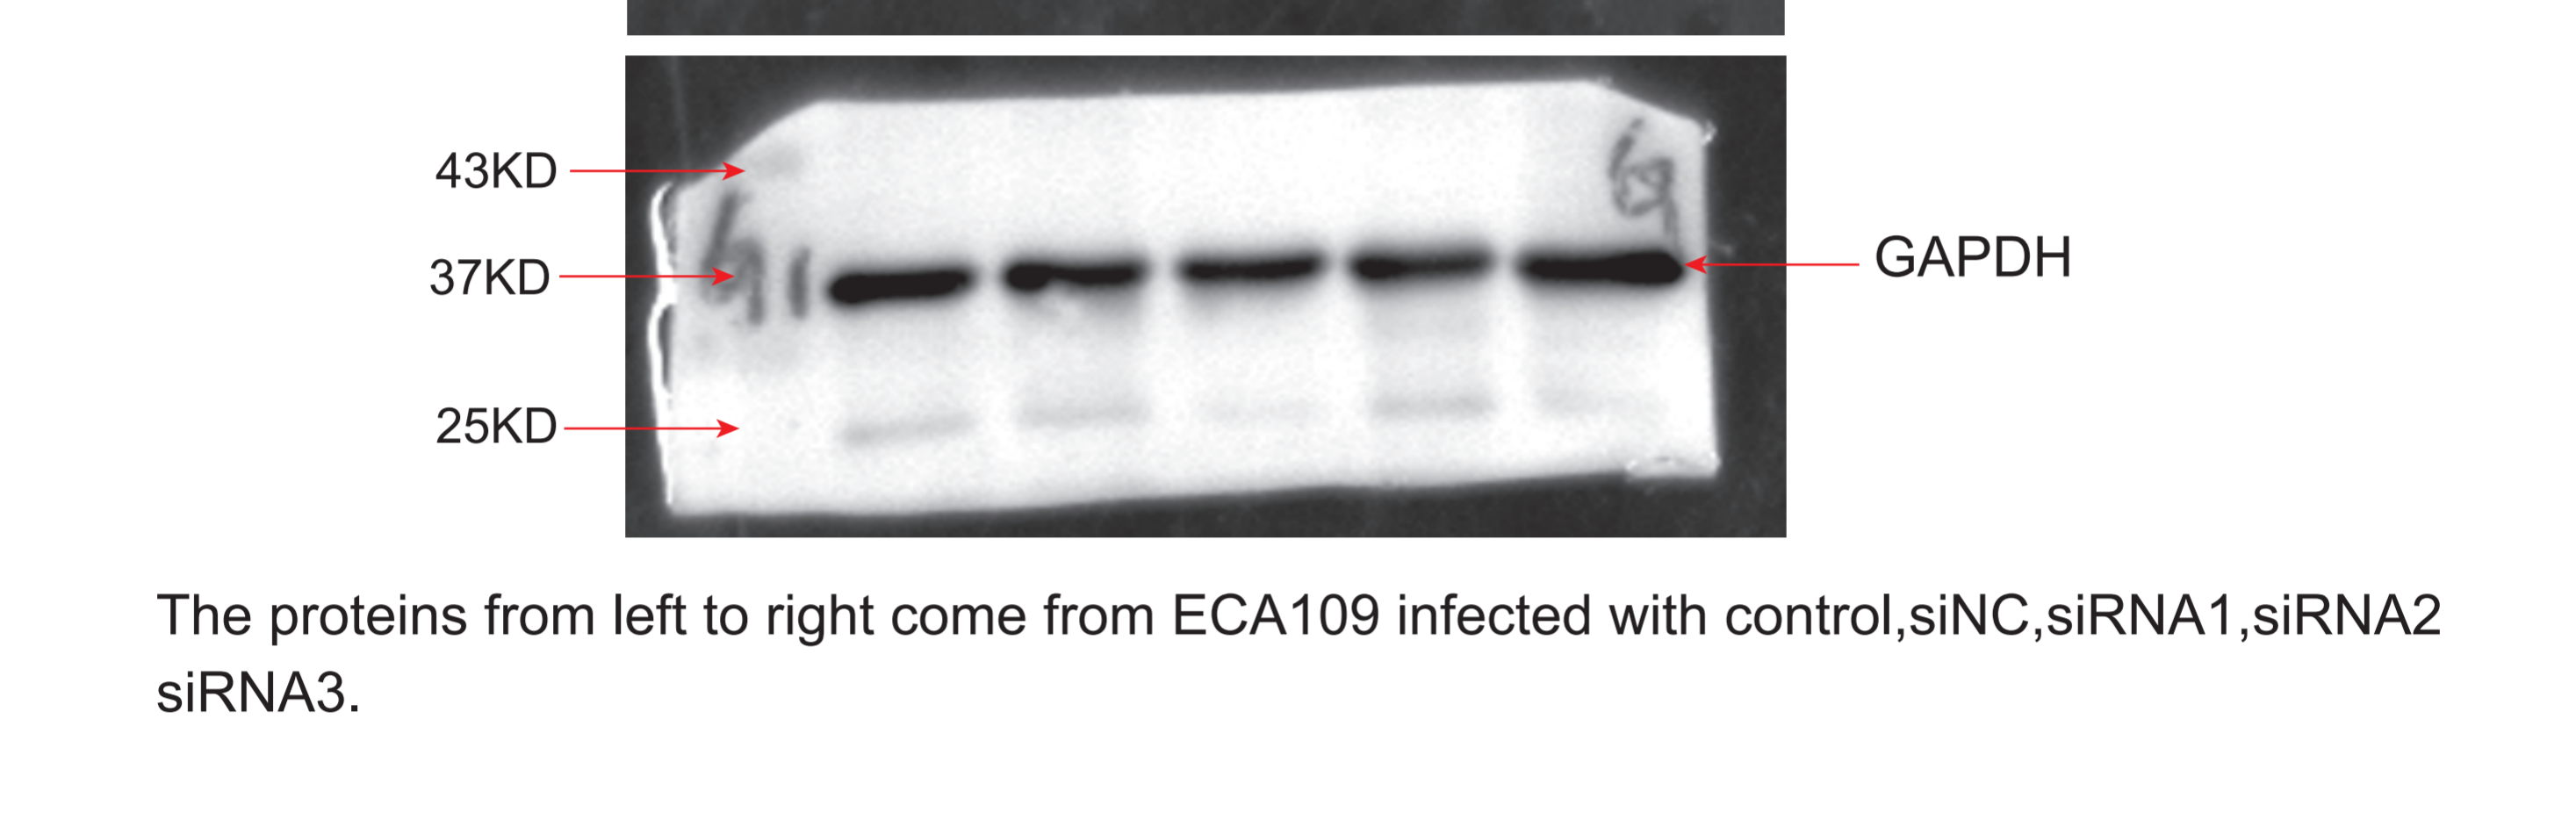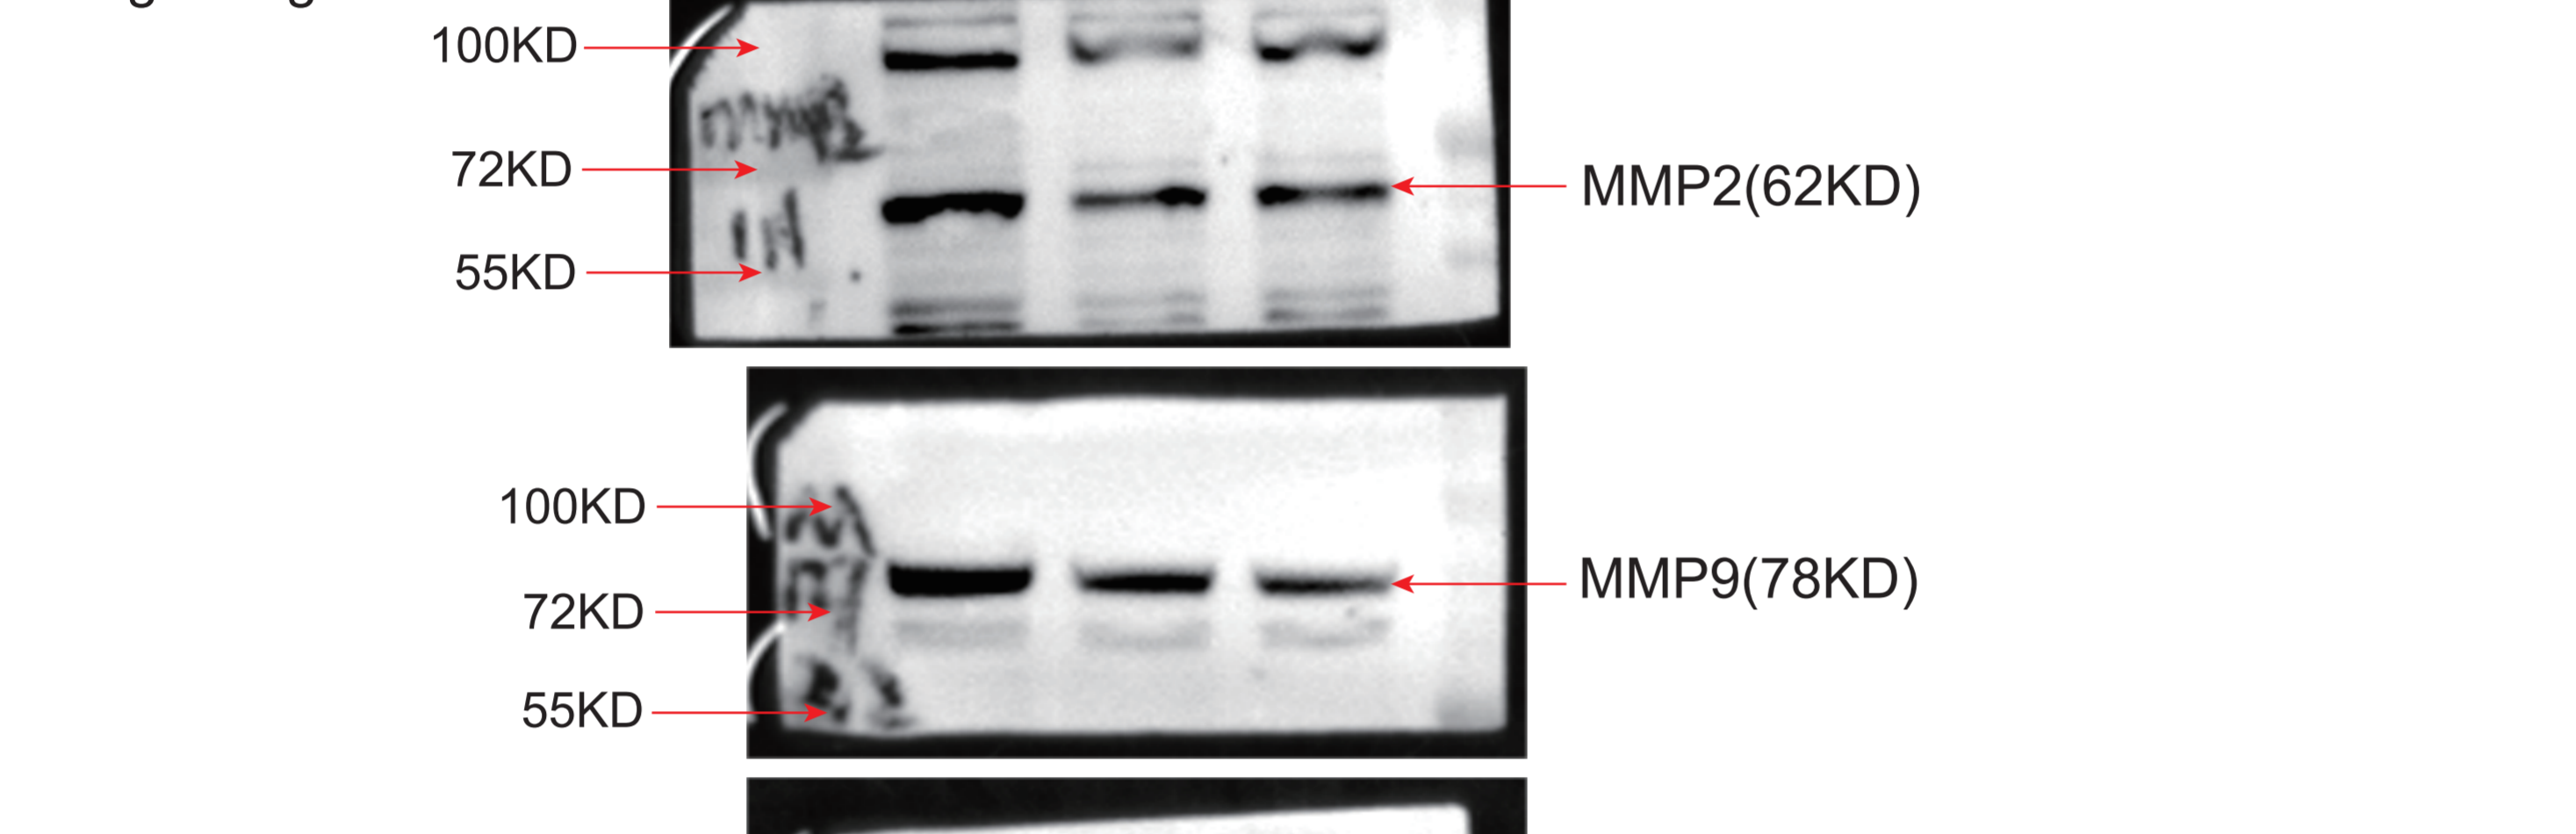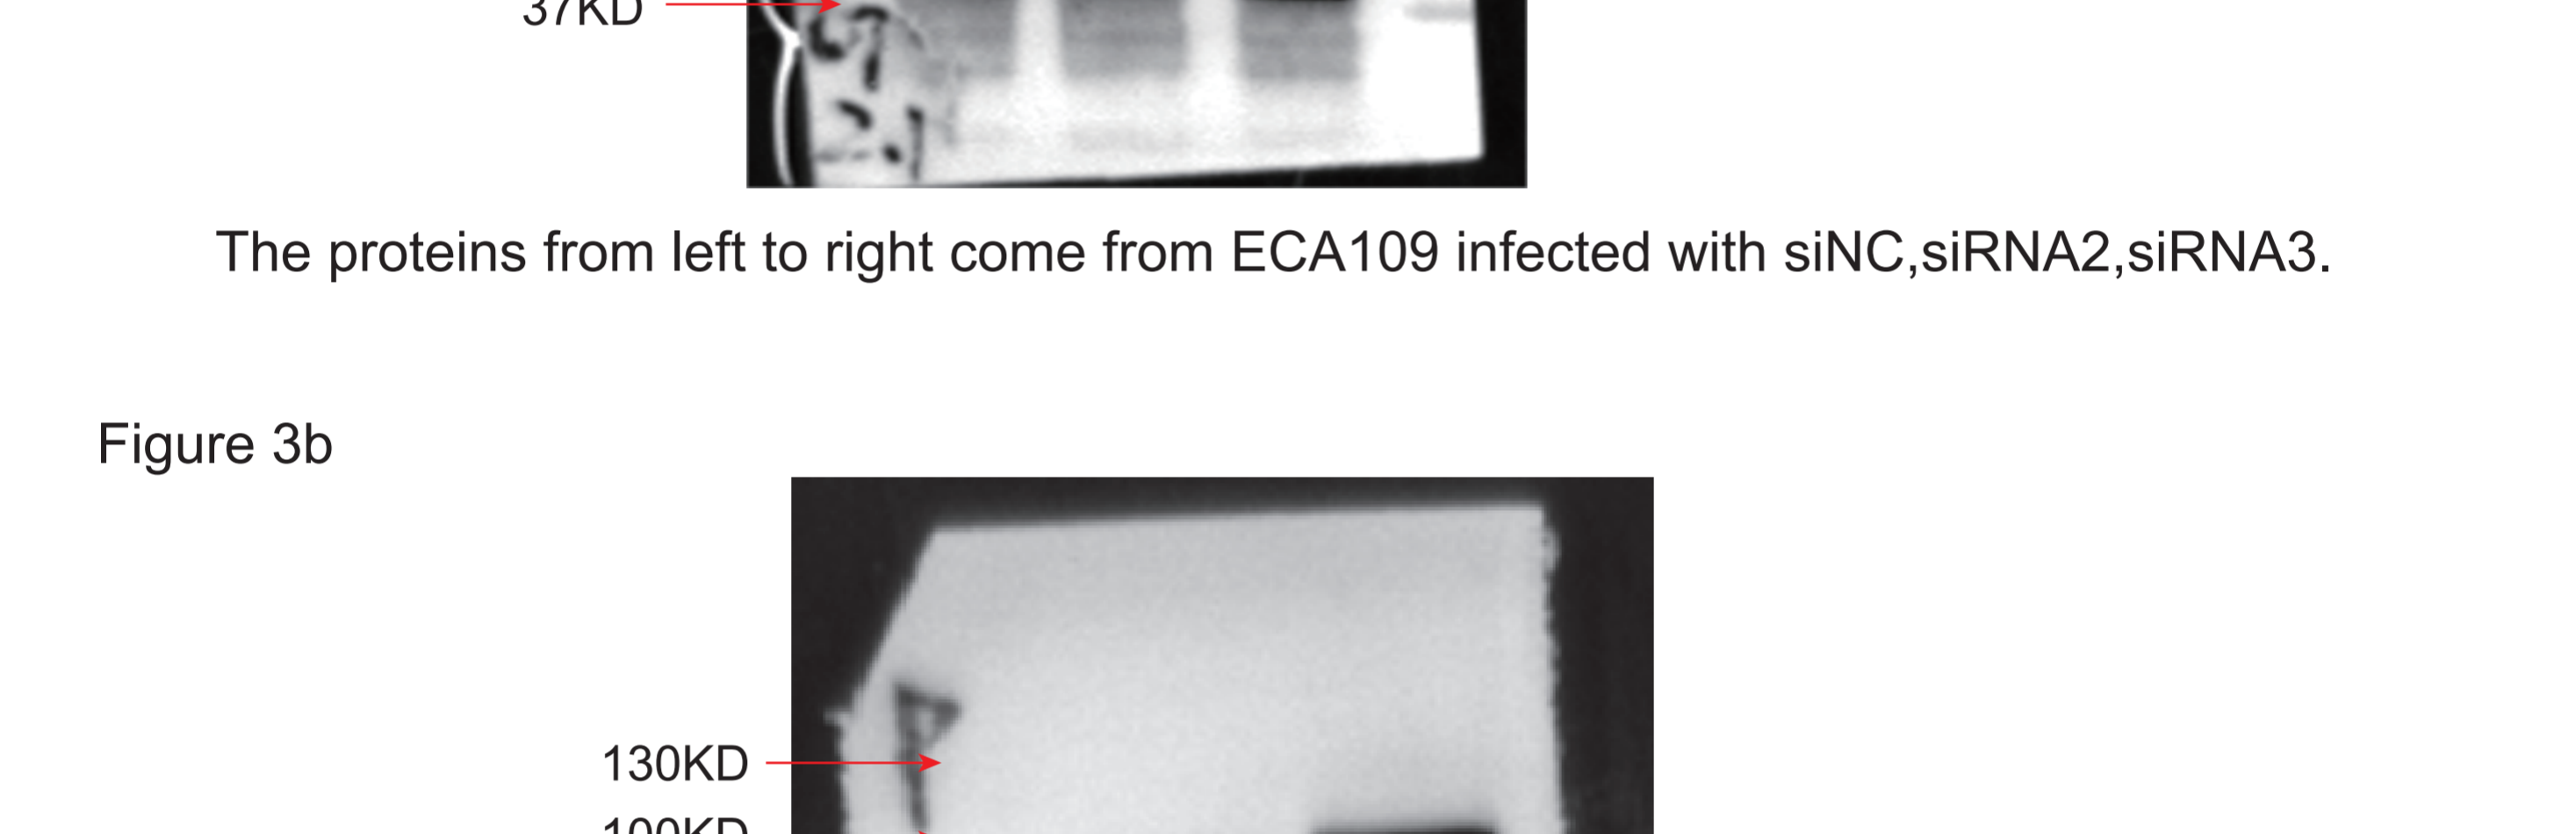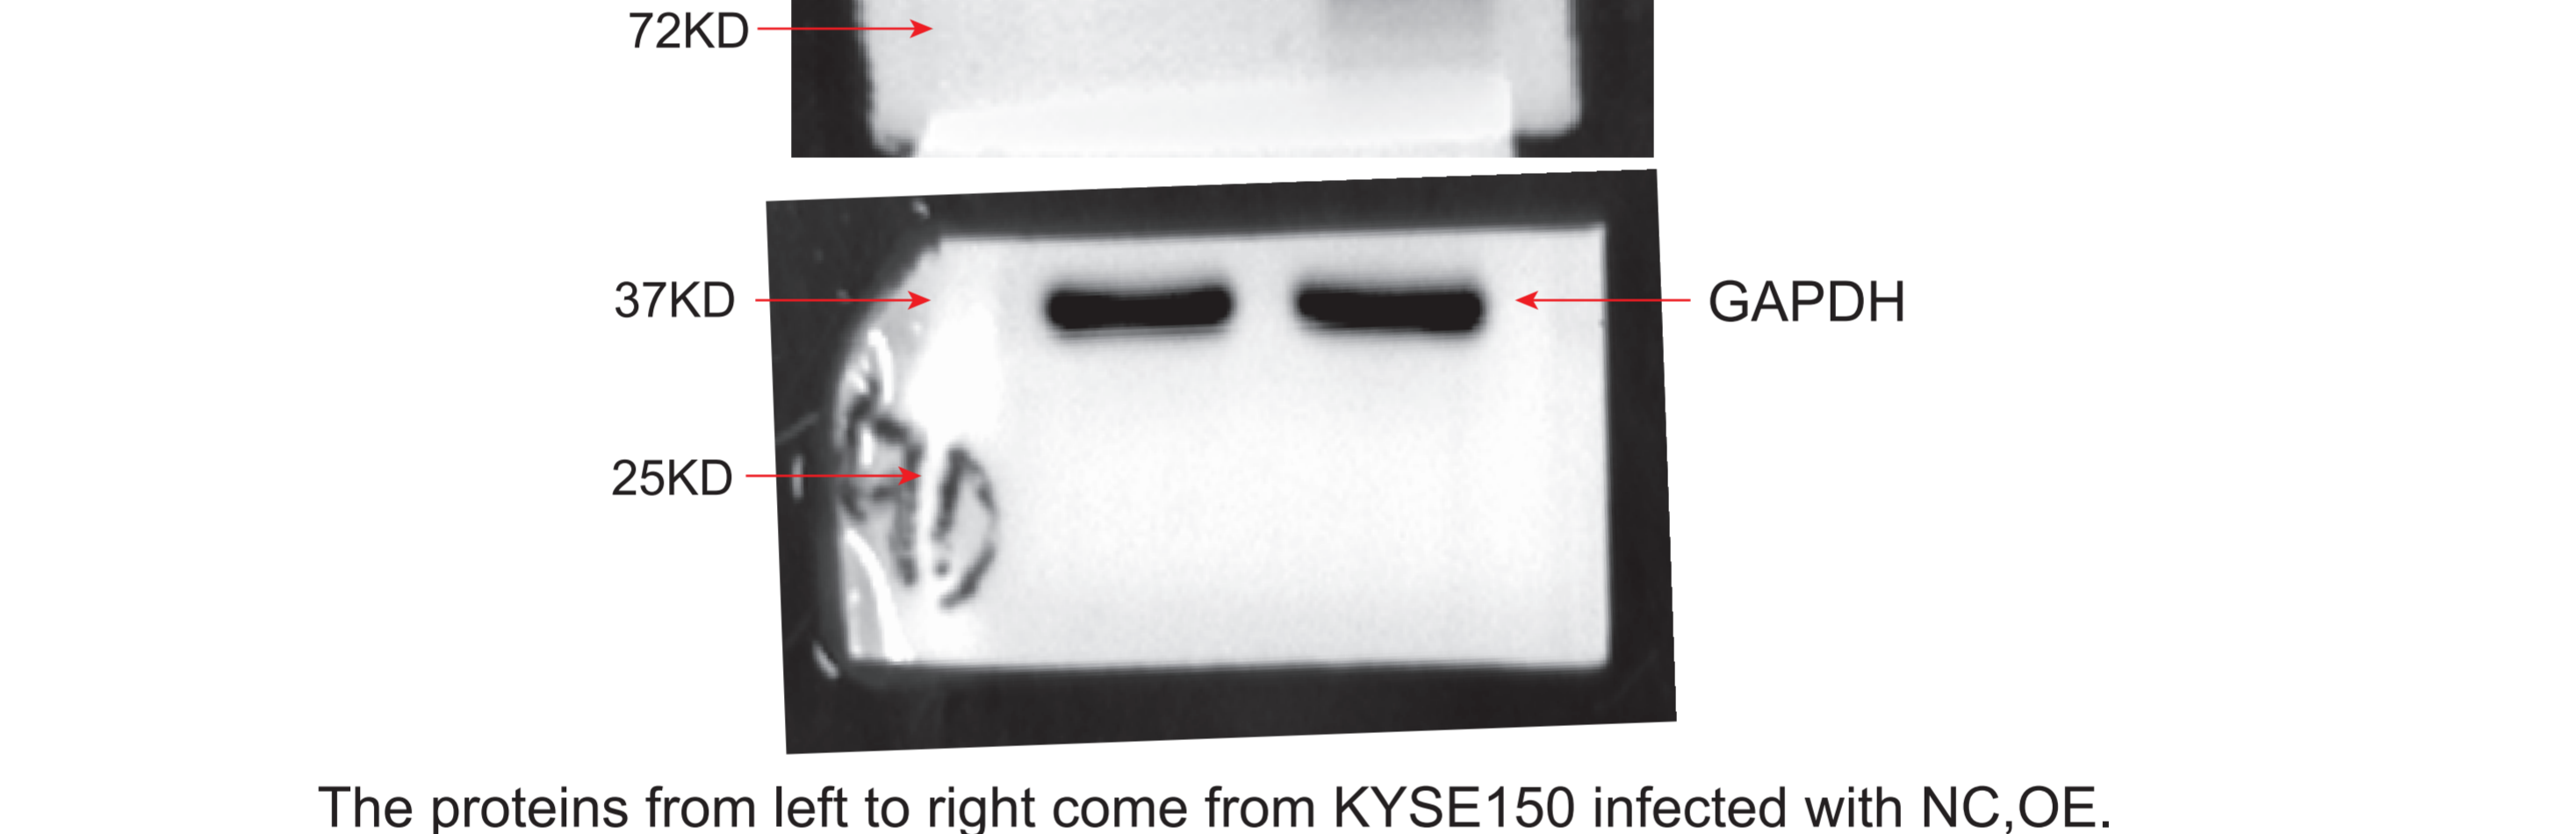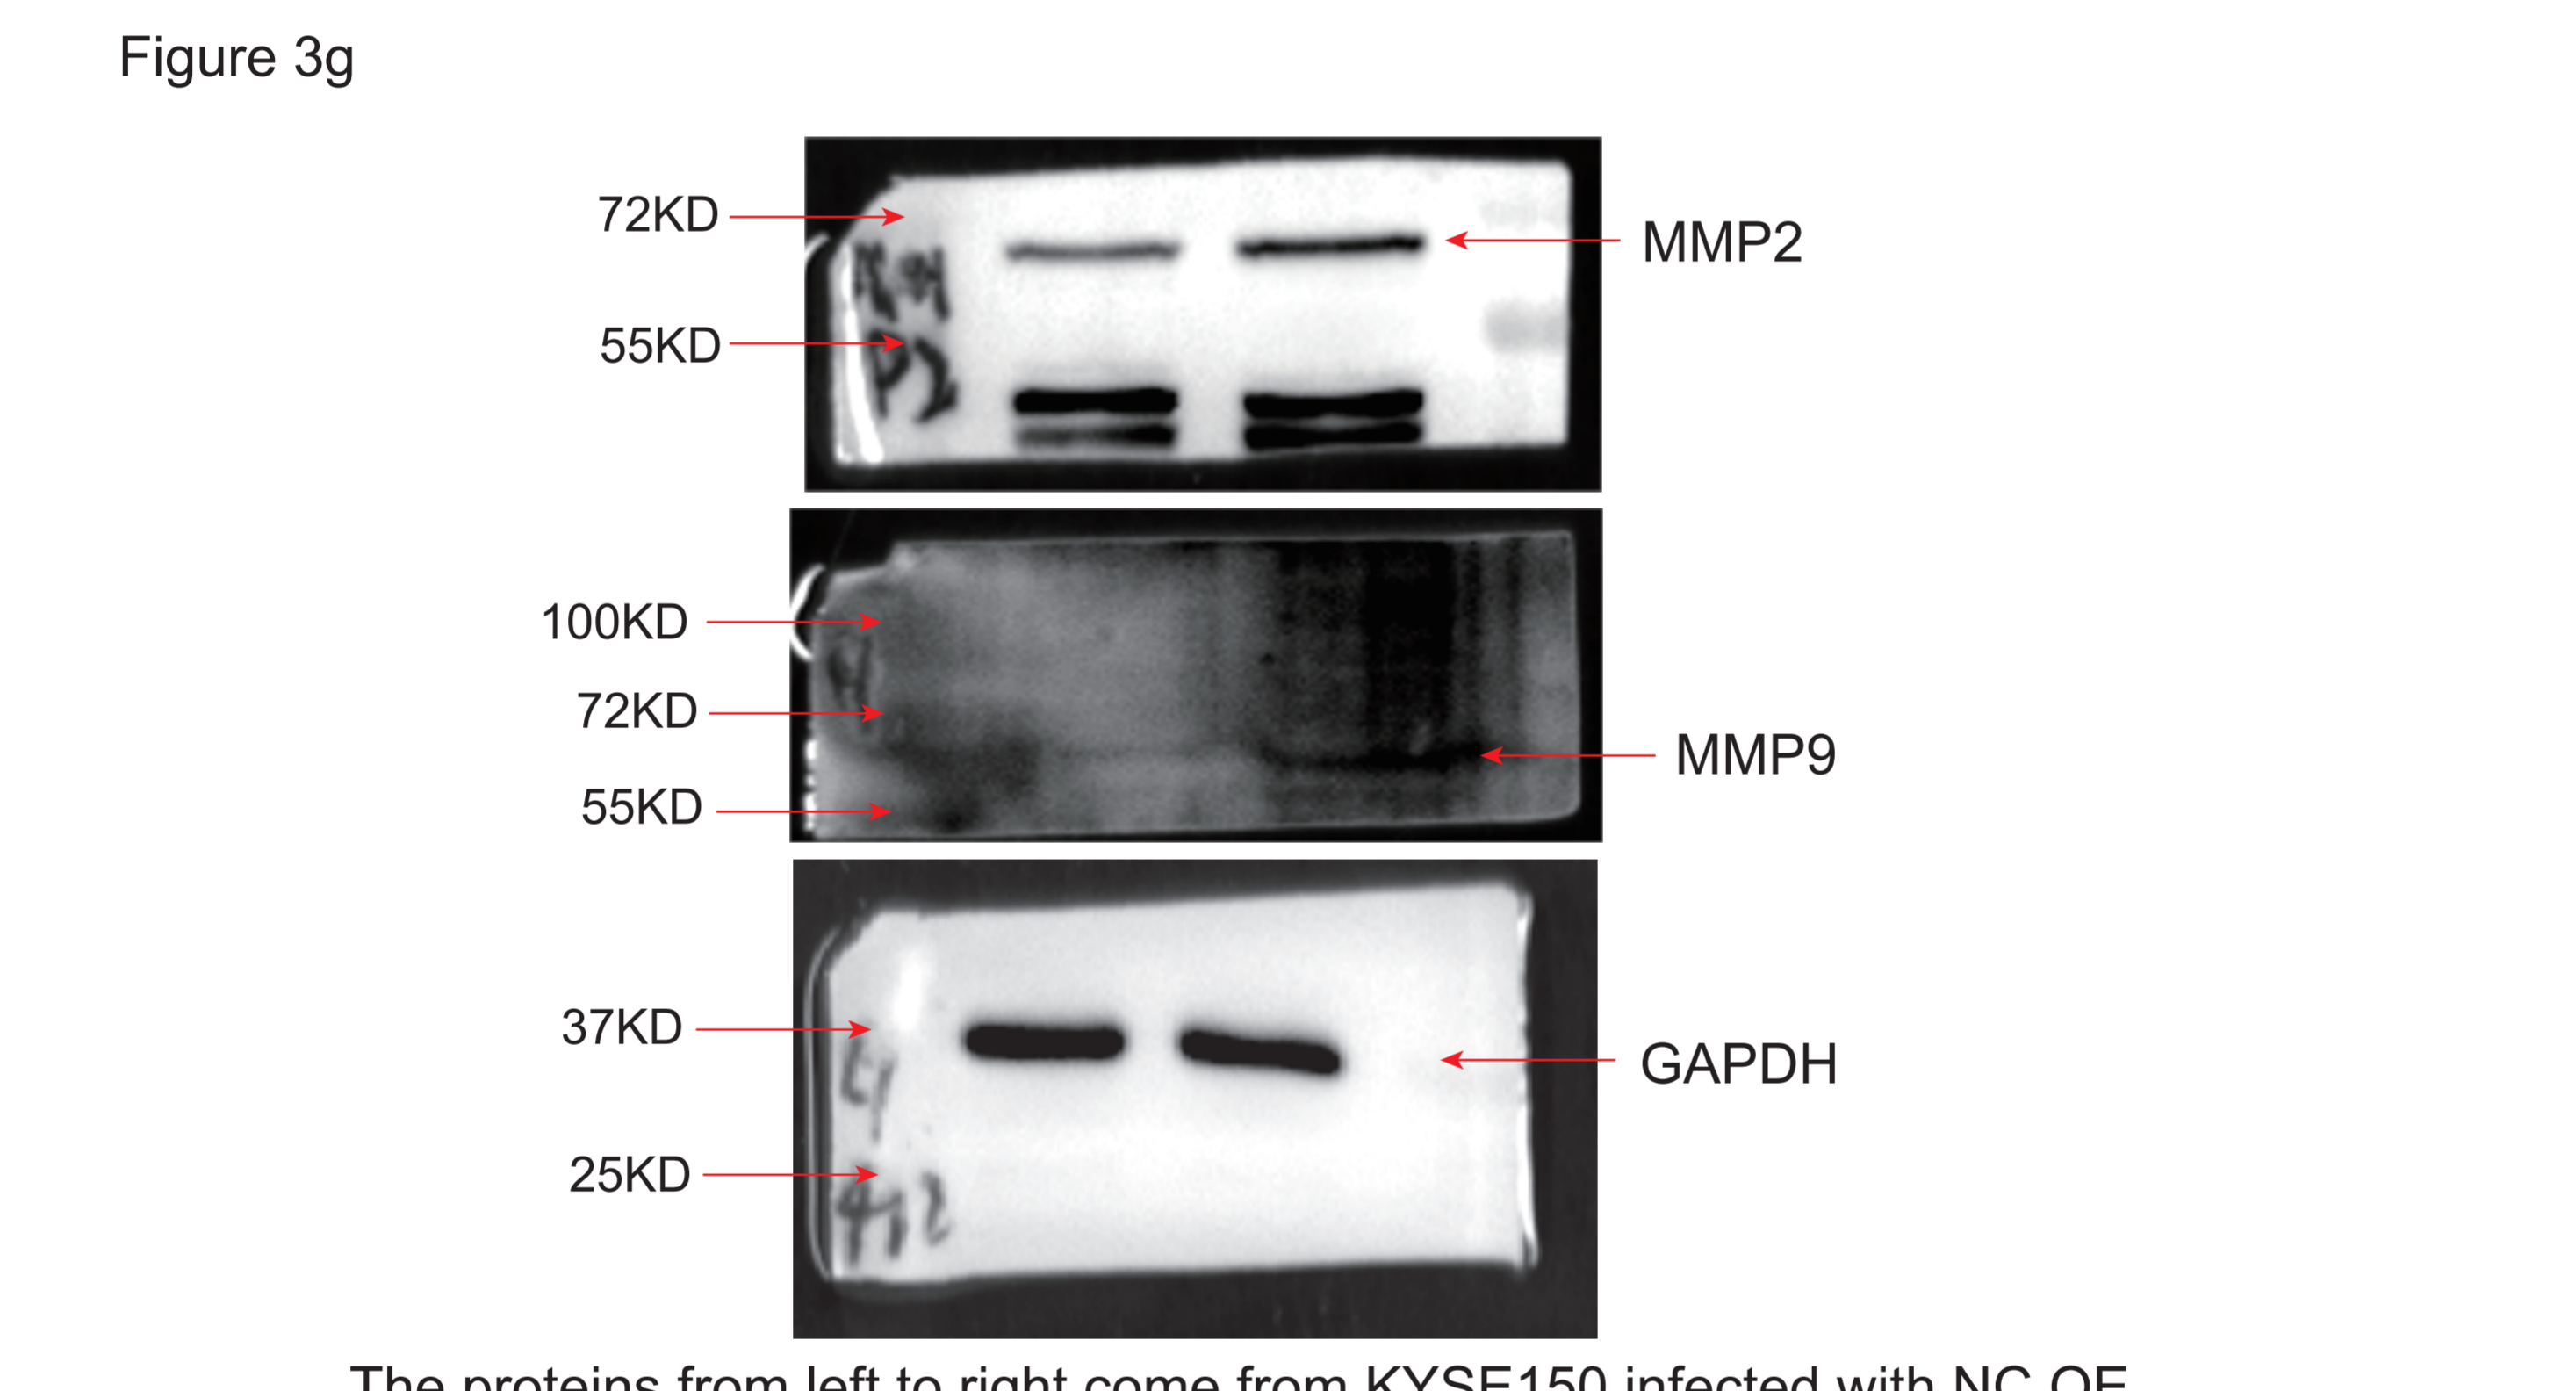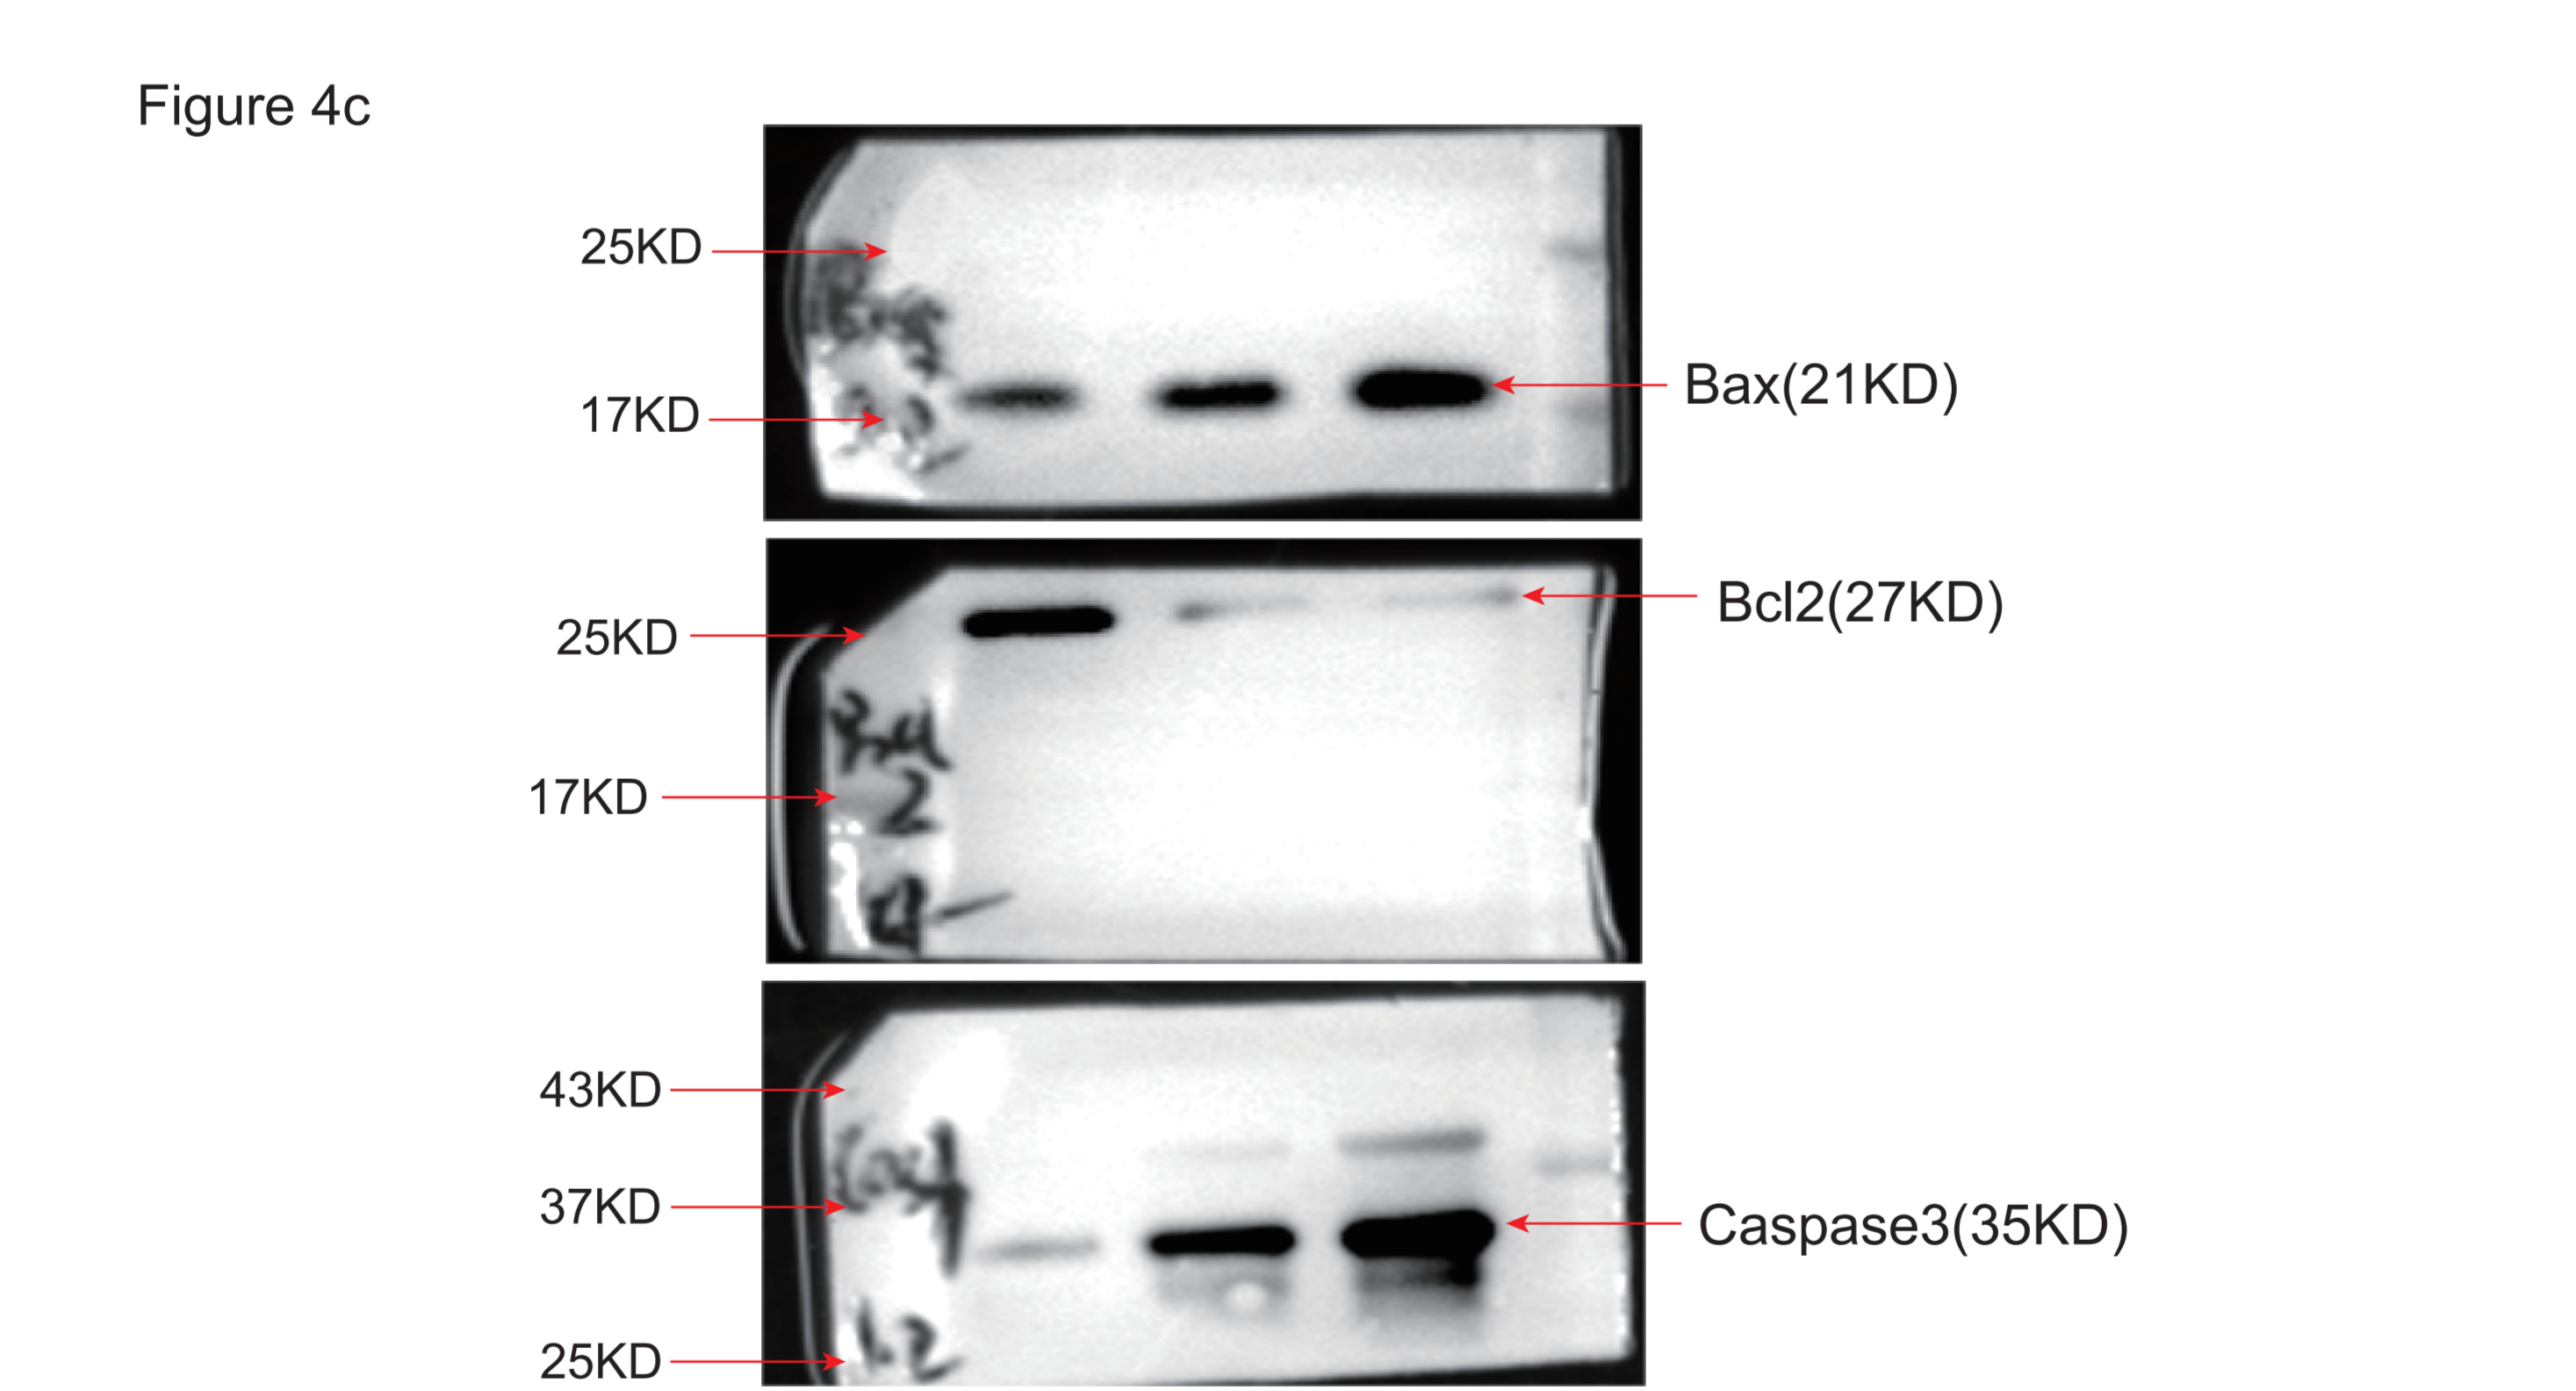

Supplement: MOESM2 [file 26105508]
