# Supplementary material for: PLCD3 promotes malignant cell behaviors in esophageal squamous cell carcinoma via the PI3K/AKT/P21 signaling
Source: BMC Cancer. 2023 Sep 29;23:921. doi: 10.1186/s12885-023-11409-w (PMC10542242; doi:10.1186/s12885-023-11409-w)
Supplement: Supplementary file 4 — Supplementary Material 4 [file 12885_2023_11409_MOESM4_ESM.xlsx]

## Sheet: Sheet1
Supplementary material: TableS2.Upregulated genes caused by PLCD3 expression.
gene_name	gene_id	gene_biotype	baseMean	log2FoldChange	lfcSE	stat	pvalue
RPTN	ENSG00000215853	protein_coding	1988.59	3.47287	0.657591	5.28119	1.28e-07
MAGEC1	ENSG00000155495	protein_coding	95.8378	3.35634	0.97403	3.44582	0.000569321
GAGE2A	ENSG00000189064	protein_coding	4.42727	3.20983	1.03285	3.10776	0.00188513
RXFP1	ENSG00000171509	protein_coding	163.223	3.18767	0.480688	6.63146	3.32e-11
RPE65	ENSG00000116745	protein_coding	204.397	3.16412	0.570772	5.54358	2.96e-08
MAGEC2	ENSG00000046774	protein_coding	23.7788	3.14651	0.973111	3.23345	0.00122303
MT1A	ENSG00000205362	protein_coding	89.5338	3.00477	0.487067	6.1691	6.87e-10
LINC00508	ENSG00000256971	lncRNA	0.952809	2.91895	1.43645	2.03207	0.042147
AC008708.1	ENSG00000253357	lncRNA	15.0946	2.9147	0.695539	4.19056	2.78e-05
LCE3A	ENSG00000185962	protein_coding	91.3116	2.839	0.614136	4.62275	3.79e-06
LINC00165	ENSG00000261706	lncRNA	18.9705	2.82885	0.660379	4.28368	1.84e-05
AC108174.1	ENSG00000248112	lncRNA	20.5761	2.81849	0.472626	5.96347	2.47e-09
AC092490.1	ENSG00000249790	lncRNA	157.787	2.78999	0.527264	5.29145	1.21e-07
LINC01322	ENSG00000244128	lncRNA	157.423	2.70997	0.41719	6.49578	8.26e-11
SLC13A5	ENSG00000141485	protein_coding	815.611	2.69269	0.484402	5.55879	2.72e-08
LINC02787	ENSG00000229201	lncRNA	0.733416	2.6818	1.33304	2.01179	0.0442421
QTRT1P1	ENSG00000270524	processed_pseudogene	0.862526	2.68141	1.18264	2.26731	0.0233713
SPANXD	ENSG00000196406	protein_coding	14.9576	2.60158	0.939867	2.76803	0.00563969
H19	ENSG00000130600	lncRNA	15681.3	2.60002	0.463594	5.60839	2.04e-08
C20orf197	ENSG00000176659	lncRNA	143.383	2.51984	0.451764	5.57778	2.44e-08
LINC00707	ENSG00000238266	lncRNA	635.467	2.50342	0.449587	5.56827	2.57e-08
DCAF4L2	ENSG00000176566	protein_coding	10.5033	2.49304	1.15147	2.16509	0.0303807
CT83	ENSG00000204019	protein_coding	36.1917	2.38649	0.900081	2.65142	0.00801538
AC103808.3	ENSG00000265717	lncRNA	3.72452	2.37786	0.957663	2.48299	0.0130286
GOLGA6L7	ENSG00000261649	protein_coding	31.6418	2.36632	0.537028	4.40633	1.05e-05
SPANXA2	ENSG00000203926	protein_coding	2.65937	2.36397	1.12691	2.09774	0.0359278
AC008687.6	ENSG00000269706	unprocessed_pseudogene	2.76045	2.3537	0.661419	3.55856	0.0003729
AC002480.1	ENSG00000232759	lncRNA	28.7388	2.28089	0.447351	5.09865	3.42e-07
AL035696.1	ENSG00000205653	lncRNA	1.80211	2.25081	0.814598	2.76309	0.00572568
AL357833.1	ENSG00000236892	lncRNA	0.772544	2.24423	1.02596	2.18744	0.0287101
B3GNT6	ENSG00000198488	protein_coding	197.361	2.2379	0.562362	3.97947	6.91e-05
CRCT1	ENSG00000169509	protein_coding	6252.54	2.2106	0.593684	3.72353	0.000196456
C5orf17	ENSG00000248874	lncRNA	18.8831	2.20747	0.597146	3.6967	0.000218419
TRIM49	ENSG00000168930	protein_coding	2.82474	2.15752	0.837506	2.57612	0.00999147
AC009831.2	ENSG00000266105	processed_pseudogene	10.0641	2.10785	0.688307	3.06237	0.00219595
LINC02154	ENSG00000235385	lncRNA	94.9722	2.0858	0.472587	4.41358	1.02e-05
NT5E	ENSG00000135318	protein_coding	4248.5	2.08568	0.297471	7.01138	2.36e-12
TFPI2	ENSG00000105825	protein_coding	668.24	2.08302	0.413536	5.03709	4.73e-07
OTOP3	ENSG00000182938	protein_coding	954.682	2.08149	0.582835	3.57132	0.000355182
AL138789.1	ENSG00000233589	lncRNA	164.427	2.07816	0.401677	5.17371	2.29e-07
IL13RA2	ENSG00000123496	protein_coding	166.577	2.07494	0.435888	4.76025	1.93e-06
SPANXC	ENSG00000198573	protein_coding	14.8223	2.05556	0.853784	2.40759	0.0160584
DNER	ENSG00000187957	protein_coding	322.519	2.05264	0.42103	4.87528	1.09e-06
SLC38A4	ENSG00000139209	protein_coding	342.324	2.04596	0.368391	5.55377	2.8e-08
IL1RL1	ENSG00000115602	protein_coding	224.32	2.03826	0.372682	5.46916	4.52e-08
GAGE1	ENSG00000205777	protein_coding	2.09531	2.03012	0.871573	2.32926	0.0198454
OTOS	ENSG00000178602	protein_coding	1.14678	1.9804	0.759089	2.60892	0.00908288
CCL14	ENSG00000276409	protein_coding	36.3751	1.97326	0.49209	4.00997	6.07e-05
Z82249.1	ENSG00000233179	lncRNA	1.06029	1.96884	0.879365	2.23893	0.0251605
AC008517.1	ENSG00000248588	lncRNA	2.80735	1.96625	0.715359	2.74861	0.00598479
LINC00973	ENSG00000240476	lncRNA	8.92884	1.96064	0.519425	3.77464	0.00016024
IGFBP6	ENSG00000167779	protein_coding	4915.5	1.95602	0.314413	6.22118	4.93e-10
FAM25A	ENSG00000188100	protein_coding	774.36	1.94657	0.551389	3.53029	0.0004151
LINC00941	ENSG00000235884	lncRNA	206.615	1.94259	0.373046	5.20736	1.92e-07
LINC02122	ENSG00000248474	lncRNA	2.10578	1.93515	0.75176	2.57416	0.0100484
FIBCD1	ENSG00000130720	protein_coding	380.879	1.93141	0.414036	4.66483	3.09e-06
CDH16	ENSG00000166589	protein_coding	378.314	1.93013	0.514807	3.74924	0.000177372
HBE1	ENSG00000213931	protein_coding	9.83762	1.91383	0.635767	3.01028	0.0026101
UPK1B	ENSG00000114638	protein_coding	4110.15	1.90191	0.612758	3.10385	0.00191018
CRHR1	ENSG00000120088	protein_coding	11.0549	1.90184	0.476958	3.98743	6.68e-05
LINC02660	ENSG00000226005	lncRNA	2.90994	1.89638	0.608375	3.11712	0.00182628
IL6-AS1	ENSG00000179428	lncRNA	6.60708	1.89028	0.42444	4.45358	8.44e-06
AC112482.1	ENSG00000243016	unprocessed_pseudogene	1.36878	1.88238	0.705476	2.66824	0.00762508
CGB8	ENSG00000213030	protein_coding	9.86778	1.8793	0.562458	3.34123	0.000834093
LINC02492	ENSG00000250590	lncRNA	11.8442	1.87878	0.908045	2.06904	0.0385426
AQP7P2	ENSG00000181997	unprocessed_pseudogene	1.60488	1.86452	0.551835	3.37877	0.000728112
AC093159.1	ENSG00000228541	lncRNA	35.525	1.86117	0.430167	4.32662	1.51e-05
ALOX12	ENSG00000108839	protein_coding	1621.43	1.85417	0.320402	5.787	7.17e-09
PRSS3	ENSG00000010438	protein_coding	914.704	1.8518	0.429147	4.31507	1.6e-05
SPANXB1	ENSG00000227234	protein_coding	15.1094	1.82712	0.756608	2.41488	0.0157405
ADRA1B	ENSG00000170214	protein_coding	49.0471	1.81056	0.410746	4.40799	1.04e-05
HES3	ENSG00000173673	protein_coding	0.596464	1.80952	0.74082	2.44259	0.0145824
AL512324.3	ENSG00000278531	unprocessed_pseudogene	11.9416	1.79792	0.47588	3.7781	0.000158026
TBC1D3	ENSG00000274611	protein_coding	0.740983	1.78721	0.899543	1.9868	0.0469447
AL596223.1	ENSG00000229261	lncRNA	13.5912	1.78621	0.534816	3.33985	0.000838229
LINC00520	ENSG00000258791	lncRNA	243.925	1.77465	0.43343	4.09444	4.23e-05
LNCAROD	ENSG00000231131	lncRNA	207.44	1.76667	0.468907	3.76763	0.000164802
PPP1R3C	ENSG00000119938	protein_coding	1333.54	1.75517	0.432481	4.05839	4.94e-05
HMGA2	ENSG00000149948	protein_coding	2771.53	1.74683	0.385401	4.5325	5.83e-06
AP001547.1	ENSG00000254885	lncRNA	4.85553	1.74461	0.474114	3.67973	0.000233483
MTCO1P8	ENSG00000234700	unprocessed_pseudogene	0.933314	1.74406	0.756276	2.30611	0.0211045
AC093904.3	ENSG00000244310	lncRNA	12.9734	1.74344	0.42985	4.05594	4.99e-05
PWWP3B	ENSG00000157502	protein_coding	135.224	1.7423	0.462248	3.76919	0.000163779
AC090515.4	ENSG00000259353	lncRNA	5.01961	1.74173	0.436307	3.992	6.55e-05
IL6	ENSG00000136244	protein_coding	587.394	1.72928	0.399703	4.32641	1.52e-05
GDF15	ENSG00000130513	protein_coding	598.423	1.7277	0.369085	4.68103	2.85e-06
AL359979.1	ENSG00000226601	lncRNA	12.3857	1.71855	0.501771	3.42497	0.000614871
PRR9	ENSG00000203783	protein_coding	256.59	1.71502	0.664028	2.58275	0.00980164
LINC02323	ENSG00000259230	lncRNA	278.261	1.71283	0.349759	4.89716	9.72e-07
PHF24	ENSG00000122733	protein_coding	356.438	1.71134	0.394537	4.33759	1.44e-05
AC012354.2	ENSG00000274520	misc_RNA	1.08892	1.7022	0.757774	2.24631	0.0246841
KLHL4	ENSG00000102271	protein_coding	156.588	1.68636	0.409458	4.11853	3.81e-05
SLURP1	ENSG00000126233	protein_coding	1580.1	1.68395	0.577778	2.91453	0.00356228
AC105460.1	ENSG00000250920	lncRNA	1016.87	1.67826	0.629195	2.66731	0.00764611
GREB1L	ENSG00000141449	protein_coding	344.154	1.67621	0.439248	3.81608	0.000135589
MANCR	ENSG00000231298	lncRNA	100.51	1.65613	0.345745	4.79003	1.67e-06
ELFN2	ENSG00000166897	protein_coding	164.132	1.64434	0.451291	3.64365	0.000268803
ZFP42	ENSG00000179059	protein_coding	28.9007	1.63939	0.570029	2.87598	0.00402776
TRIM54	ENSG00000138100	protein_coding	25.242	1.63593	0.437797	3.73673	0.000186427
NCAM1	ENSG00000149294	protein_coding	598.139	1.63452	0.416199	3.92726	8.59e-05
LINP1	ENSG00000223784	lncRNA	185.741	1.63346	0.428036	3.81618	0.000135534
SYT8	ENSG00000149043	protein_coding	765.478	1.6312	0.420883	3.87565	0.00010634
HRCT1	ENSG00000196196	protein_coding	47.7281	1.62626	0.392066	4.14793	3.35e-05
AC129492.6	ENSG00000275011	unprocessed_pseudogene	146.409	1.6222	0.526933	3.07856	0.00208005
SPRR4	ENSG00000184148	protein_coding	527.44	1.6219	0.482797	3.35939	0.000781157
CDSN	ENSG00000204539	protein_coding	157.936	1.62005	0.528614	3.06471	0.00217878
GSDMA	ENSG00000167914	protein_coding	439.456	1.61891	0.407255	3.97517	7.03e-05
AL049775.3	ENSG00000258945	lncRNA	3.88231	1.61336	0.441937	3.65065	0.000261579
BCAT1	ENSG00000060982	protein_coding	6429	1.60558	0.321417	4.9953	5.87e-07
SSX5	ENSG00000165583	protein_coding	1.20287	1.60307	0.590295	2.7157	0.00661349
OTOP2	ENSG00000183034	protein_coding	128.348	1.60172	0.448372	3.5723	0.000353853
MYEOV	ENSG00000172927	protein_coding	1777.69	1.60116	0.467267	3.42665	0.000611071
AC107308.1	ENSG00000277945	lncRNA	22.6259	1.59781	0.420569	3.79917	0.000145181
RPSAP52	ENSG00000241749	transcribed_processed_pseudogene	129.556	1.59572	0.341918	4.66697	3.06e-06
FLNC	ENSG00000128591	protein_coding	7261.96	1.59364	0.404836	3.93651	8.27e-05
AL353740.1	ENSG00000203434	lncRNA	3.32561	1.5928	0.709268	2.2457	0.0247231
AC108676.1	ENSG00000244675	lncRNA	270.562	1.59042	0.451589	3.52183	0.00042858
LHX1-DT	ENSG00000277268	lncRNA	37.6106	1.5812	0.548124	2.88475	0.00391731
HCAR1	ENSG00000196917	protein_coding	43.4501	1.57819	0.448989	3.51499	0.000439762
LYVE1	ENSG00000133800	protein_coding	260.795	1.57548	0.322961	4.87824	1.07e-06
C11orf87	ENSG00000185742	protein_coding	353.589	1.57473	0.534541	2.94594	0.00321971
NRG1	ENSG00000157168	protein_coding	3804.7	1.56786	0.327214	4.79154	1.66e-06
AL133467.2	ENSG00000258927	lncRNA	4.70168	1.56087	0.602181	2.59202	0.0095414
AC083841.1	ENSG00000253196	lncRNA	36.769	1.5607	0.461636	3.3808	0.000722745
LYNX1	ENSG00000180155	protein_coding	7079.07	1.56041	0.390076	4.00027	6.33e-05
AC025594.1	ENSG00000224163	unprocessed_pseudogene	3.59579	1.55508	0.572815	2.7148	0.00663155
HSPB6	ENSG00000004776	protein_coding	1179.01	1.5518	0.403269	3.84805	0.000119063
LHX1	ENSG00000273706	protein_coding	143.079	1.55163	0.548306	2.82986	0.0046568
FAM133A	ENSG00000179083	protein_coding	243.657	1.55134	0.724288	2.14188	0.0322032
AC062015.1	ENSG00000235070	lncRNA	3.61821	1.55076	0.632859	2.4504	0.0142698
AC005256.1	ENSG00000267073	lncRNA	18.3804	1.54767	0.4855	3.18778	0.00143368
SDAD1P2	ENSG00000230750	processed_pseudogene	53.2164	1.54698	0.413691	3.73947	0.000184411
SSTR5-AS1	ENSG00000261713	lncRNA	28.3568	1.54592	0.513838	3.00856	0.00262485
AC099786.2	ENSG00000224149	lncRNA	1.67669	1.54244	0.713059	2.16313	0.0305315
PHACTR3	ENSG00000087495	protein_coding	109.894	1.53929	0.456728	3.37025	0.000750998
LHX3	ENSG00000107187	protein_coding	10.5124	1.53896	0.526322	2.92399	0.00345577
PPIAP26	ENSG00000150276	processed_pseudogene	34.6355	1.53776	0.400416	3.84041	0.000122828
MIR3189	ENSG00000264175	miRNA	0.974541	1.53429	0.708756	2.16476	0.0304061
SH2D5	ENSG00000189410	protein_coding	690.58	1.52991	0.375277	4.07674	4.57e-05
AL583836.1	ENSG00000276490	protein_coding	5.11108	1.52615	0.573258	2.66225	0.00776212
ZNF474	ENSG00000164185	protein_coding	90.1623	1.52582	0.312406	4.88409	1.04e-06
SP8	ENSG00000164651	protein_coding	112.21	1.52295	0.485804	3.1349	0.00171911
APCDD1L	ENSG00000198768	protein_coding	804.489	1.51973	0.414938	3.66256	0.000249705
AC015818.3	ENSG00000263946	transcribed_processed_pseudogene	15.7601	1.51966	0.55118	2.7571	0.00583172
MMRN1	ENSG00000138722	protein_coding	337.08	1.51965	0.381677	3.9815	6.85e-05
PHF2P2	ENSG00000226057	transcribed_unprocessed_pseudogene	11.8821	1.51386	0.544781	2.77884	0.00545534
SPATA31C2	ENSG00000177910	transcribed_unprocessed_pseudogene	4.90425	1.51186	0.547774	2.76002	0.00577984
CDH12	ENSG00000154162	protein_coding	91.8336	1.50902	0.717087	2.10437	0.0353458
CGB5	ENSG00000189052	protein_coding	5.18899	1.50267	0.458057	3.28053	0.00103612
CSF3	ENSG00000108342	protein_coding	736.194	1.50259	0.46985	3.19803	0.00138371
AC120498.6	ENSG00000261294	lncRNA	1.14932	1.49827	0.585355	2.55959	0.0104794
HBB	ENSG00000244734	protein_coding	659.929	1.49771	0.392051	3.8202	0.000133342
SP9	ENSG00000217236	protein_coding	64.734	1.4975	0.405839	3.68988	0.000224363
L1CAM	ENSG00000198910	protein_coding	1718.66	1.49716	0.393752	3.80229	0.000143367
AL512324.1	ENSG00000275312	unprocessed_pseudogene	10.2382	1.49701	0.444521	3.36769	0.000758018
ECM1	ENSG00000143369	protein_coding	17026.4	1.49353	0.365965	4.08106	4.48e-05
AC243773.1	ENSG00000276707	lncRNA	2.90798	1.4933	0.612388	2.43848	0.014749
EPGN	ENSG00000182585	protein_coding	597.883	1.49196	0.517293	2.88418	0.00392438
MIR138-1	ENSG00000207954	miRNA	0.659162	1.49166	0.700604	2.12911	0.0332453
SNAP25-AS1	ENSG00000227906	lncRNA	60.4863	1.49011	0.47095	3.16405	0.00155589
LINC02582	ENSG00000261780	lncRNA	271.998	1.48518	0.649929	2.28515	0.0223043
ABLIM3	ENSG00000173210	protein_coding	1828.17	1.48505	0.302225	4.91372	8.94e-07
ANK1	ENSG00000029534	protein_coding	676.893	1.48304	0.379136	3.91162	9.17e-05
MEFV	ENSG00000103313	protein_coding	238.476	1.47915	0.360056	4.1081	3.99e-05
AL161733.1	ENSG00000236658	lncRNA	3.29385	1.47828	0.612888	2.41199	0.0158657
PID1	ENSG00000153823	protein_coding	465.356	1.47708	0.293099	5.03952	4.67e-07
RN7SL659P	ENSG00000244104	misc_RNA	2.23347	1.47639	0.584215	2.52714	0.0114996
IGHV4-4	ENSG00000276775	IG_V_gene	66.0557	1.47613	0.484823	3.04469	0.0023292
BCHE	ENSG00000114200	protein_coding	832.466	1.47407	0.415336	3.54909	0.000386568
MT1M	ENSG00000205364	protein_coding	194.536	1.46938	0.414619	3.54393	0.000394208
ACTL9	ENSG00000181786	protein_coding	0.711062	1.469	0.674828	2.17685	0.0294919
AC087612.1	ENSG00000259672	lncRNA	96.4034	1.46493	0.562617	2.60378	0.00922008
SCNN1D	ENSG00000162572	protein_coding	812.226	1.45856	0.361126	4.03893	5.37e-05
PASD1	ENSG00000166049	protein_coding	2.45339	1.45846	0.672841	2.16762	0.0301876
LINC01151	ENSG00000253819	lncRNA	3.38938	1.45506	0.533469	2.72755	0.00638067
PGM5-AS1	ENSG00000224958	lncRNA	17.5934	1.45392	0.60381	2.40791	0.0160439
AC138649.4	ENSG00000277867	processed_pseudogene	2.35612	1.45021	0.474523	3.05615	0.00224201
PNMT	ENSG00000141744	protein_coding	13.5915	1.44954	0.357596	4.05358	5.04e-05
FLNC-AS1	ENSG00000242902	lncRNA	2.44346	1.44805	0.580993	2.49237	0.0126896
NPY	ENSG00000122585	protein_coding	13.4746	1.44723	0.672823	2.15097	0.0314782
NKX2-8	ENSG00000136327	protein_coding	239.746	1.44158	0.365177	3.94762	7.89e-05
AC068506.1	ENSG00000278464	lncRNA	11.2592	1.43697	0.522511	2.75013	0.00595723
AC104024.2	ENSG00000260328	lncRNA	20.5481	1.43563	0.378261	3.79533	0.000147444
SEMA3A	ENSG00000075213	protein_coding	1396.06	1.43554	0.29413	4.88064	1.06e-06
AC112178.1	ENSG00000249803	lncRNA	10.034	1.43541	0.64849	2.21346	0.0268656
MAGEB17	ENSG00000182798	protein_coding	10.2857	1.4332	0.481486	2.97662	0.00291443
TNFSF18	ENSG00000120337	protein_coding	216.465	1.43202	0.428386	3.34283	0.000829281
ADAMTSL4	ENSG00000143382	protein_coding	2624.56	1.43149	0.292763	4.88958	1.01e-06
SLC9A4	ENSG00000180251	protein_coding	114.287	1.42214	0.454729	3.12745	0.00176327
AL049775.1	ENSG00000205562	lncRNA	47.471	1.42016	0.379825	3.73898	0.000184766
OLAH	ENSG00000152463	protein_coding	23.013	1.41809	0.407351	3.48124	0.000499098
AC092327.2	ENSG00000269826	lncRNA	1.44344	1.41808	0.597214	2.37449	0.0175732
APOA5	ENSG00000110243	protein_coding	1.5366	1.414	0.526201	2.68718	0.00720578
DES	ENSG00000175084	protein_coding	30990.6	1.41383	0.578677	2.44322	0.014557
AL450322.1	ENSG00000228353	lncRNA	2.03571	1.41377	0.551034	2.56566	0.0102978
AC068633.1	ENSG00000243276	lncRNA	5.22993	1.41353	0.708392	1.99541	0.0459978
VGLL1	ENSG00000102243	protein_coding	122.601	1.41309	0.441479	3.2008	0.00137046
LINC02538	ENSG00000272549	lncRNA	14.6095	1.41297	0.509089	2.77549	0.00551186
CCL13	ENSG00000181374	protein_coding	224.393	1.41076	0.426333	3.30905	0.000936125
AC080079.1	ENSG00000250725	processed_pseudogene	1.27179	1.40637	0.498954	2.81863	0.00482288
AC078820.1	ENSG00000258088	lncRNA	17.2376	1.40591	0.524044	2.68282	0.00730054
CHRDL2	ENSG00000054938	protein_coding	795.258	1.4028	0.411974	3.40508	0.000661455
AP000812.3	ENSG00000256518	unprocessed_pseudogene	4.57133	1.39967	0.665715	2.1025	0.0355095
ELFN1-AS1	ENSG00000236081	lncRNA	45.1976	1.39859	0.454574	3.07671	0.00209297
KLF14	ENSG00000266265	protein_coding	56.0607	1.39838	0.410791	3.40413	0.000663757
AC004080.15	ENSG00000278592	misc_RNA	2.34971	1.39813	0.535384	2.61146	0.00901576
AC012613.1	ENSG00000248647	lncRNA	3.25191	1.3978	0.492213	2.83982	0.00451388
FAM25G	ENSG00000189090	protein_coding	5.22882	1.39634	0.506157	2.75871	0.00580296
PLAAT5	ENSG00000168004	protein_coding	74.7347	1.3927	0.493917	2.81971	0.00480673
LINC01559	ENSG00000180861	lncRNA	280.892	1.39196	0.413267	3.36817	0.000756684
HKDC1	ENSG00000156510	protein_coding	203.856	1.39022	0.48707	2.85424	0.00431395
SLC34A3	ENSG00000198569	protein_coding	54.9823	1.38514	0.325067	4.2611	2.03e-05
TOR4A	ENSG00000198113	protein_coding	2726.18	1.38358	0.303104	4.5647	5e-06
IFNL1	ENSG00000182393	protein_coding	11.2692	1.38204	0.420622	3.2857	0.00101731
AL136982.5	ENSG00000271573	processed_pseudogene	71.2802	1.38061	0.529871	2.60556	0.00917251
LINC02621	ENSG00000234756	lncRNA	27.6337	1.38053	0.547322	2.52233	0.0116582
LINC01385	ENSG00000251604	lncRNA	3.78293	1.37136	0.51019	2.68794	0.00718951
ZFP91-CNTF	ENSG00000255073	protein_coding	1.80887	1.36983	0.372565	3.67676	0.000236218
TIMP4	ENSG00000157150	protein_coding	70.487	1.36924	0.363188	3.77005	0.000163215
TAS1R3	ENSG00000169962	protein_coding	146.901	1.36678	0.255297	5.35367	8.62e-08
ARL14EPL	ENSG00000268223	protein_coding	5.01587	1.36308	0.614972	2.21648	0.0266585
AL450469.2	ENSG00000232121	lncRNA	0.67812	1.36278	0.662704	2.0564	0.0397444
CUBNP2	ENSG00000234993	unprocessed_pseudogene	5.23532	1.36253	0.539639	2.52489	0.0115734
AKAP12	ENSG00000131016	protein_coding	2483.66	1.36094	0.299644	4.54186	5.58e-06
RAET1E	ENSG00000164520	protein_coding	571.634	1.36033	0.437803	3.10717	0.00188889
CCNA1	ENSG00000133101	protein_coding	1963.54	1.36009	0.524864	2.59133	0.00956071
PHYHIP	ENSG00000168490	protein_coding	206.496	1.35983	0.295707	4.59859	4.25e-06
GSTA8P	ENSG00000220377	unprocessed_pseudogene	14.8796	1.35962	0.571733	2.37807	0.0174036
SPRR3	ENSG00000163209	protein_coding	86148.9	1.35882	0.61203	2.22018	0.0264067
AREG	ENSG00000109321	protein_coding	3135.96	1.3535	0.359397	3.76604	0.000165856
NCAM1-AS1	ENSG00000227487	lncRNA	2.35503	1.35048	0.532446	2.53637	0.011201
LINC02241	ENSG00000251629	lncRNA	42.4829	1.34505	0.654763	2.05426	0.0399504
LCE1F	ENSG00000240386	protein_coding	35.4921	1.34175	0.563531	2.38097	0.0172673
CACNG4	ENSG00000075461	protein_coding	647.341	1.34147	0.443711	3.0233	0.00250037
PNLDC1	ENSG00000146453	protein_coding	262.516	1.34117	0.517819	2.59004	0.00959643
AC002398.2	ENSG00000267328	lncRNA	2.81901	1.33797	0.533738	2.5068	0.0121831
AC002480.2	ENSG00000232949	lncRNA	5.97489	1.33588	0.419981	3.18081	0.00146862
AL358394.1	ENSG00000227683	lncRNA	20.9579	1.33349	0.427311	3.12066	0.00180446
LAMA3	ENSG00000053747	protein_coding	27776.5	1.32454	0.303326	4.36673	1.26e-05
AC010255.2	ENSG00000249610	lncRNA	7.88504	1.32383	0.420461	3.14853	0.00164093
CYP4F22	ENSG00000171954	protein_coding	895.259	1.32094	0.455571	2.89952	0.00373734
MMP1	ENSG00000196611	protein_coding	15298	1.31895	0.377826	3.49089	0.000481422
AC018470.1	ENSG00000280414	TEC	9.9489	1.31073	0.406324	3.22582	0.00125612
CYSRT1	ENSG00000197191	protein_coding	1849.44	1.30716	0.440532	2.96724	0.00300491
SCEL-AS1	ENSG00000224347	lncRNA	4.54028	1.30307	0.561421	2.32103	0.0202854
AC009084.1	ENSG00000265408	lncRNA	6.07774	1.30307	0.557871	2.33579	0.019502
ZNF444P1	ENSG00000259738	processed_pseudogene	2.80637	1.30137	0.439745	2.95937	0.00308272
IFNL4P1	ENSG00000272311	unprocessed_pseudogene	0.981471	1.29654	0.637354	2.03426	0.0419258
AC005077.4	ENSG00000230882	processed_pseudogene	468.678	1.29534	0.366953	3.52999	0.000415581
KSR1P1	ENSG00000229485	processed_pseudogene	0.669594	1.29509	0.567883	2.28055	0.0225748
AC110619.1	ENSG00000218416	lncRNA	103.203	1.28976	0.344946	3.73901	0.000184744
ALPP	ENSG00000163283	protein_coding	17.7427	1.28663	0.545278	2.35959	0.0182953
CALB1	ENSG00000104327	protein_coding	1173.39	1.28639	0.576464	2.23151	0.0256474
FAM107A	ENSG00000168309	protein_coding	310.168	1.28576	0.381246	3.37251	0.000744861
CCDC144NL	ENSG00000205212	transcribed_unprocessed_pseudogene	44.125	1.28404	0.625799	2.05184	0.0401852
ACRP1	ENSG00000175509	processed_pseudogene	2.46171	1.28327	0.551513	2.32681	0.0199755
MMP10	ENSG00000166670	protein_coding	2824.91	1.27809	0.458324	2.78862	0.00529327
AL512785.2	ENSG00000254706	protein_coding	23.5703	1.27694	0.475341	2.68637	0.00722338
LINC01615	ENSG00000223485	lncRNA	282.951	1.27444	0.419886	3.03519	0.00240382
EREG	ENSG00000124882	protein_coding	4127.07	1.27407	0.494688	2.5755	0.0100094
AC010457.1	ENSG00000251257	lncRNA	3.95338	1.27294	0.436027	2.91941	0.0035069
FAM43B	ENSG00000183114	protein_coding	73.6062	1.27247	0.365455	3.48189	0.000497883
PCDHA11	ENSG00000249158	protein_coding	45.6166	1.27152	0.644031	1.97431	0.0483462
LCN10	ENSG00000187922	protein_coding	7.90939	1.27058	0.426568	2.97861	0.00289556
LRRTM1	ENSG00000162951	protein_coding	16.9888	1.26964	0.528653	2.40166	0.016321
CBSL	ENSG00000274276	protein_coding	27.9552	1.26901	0.463416	2.7384	0.00617399
PCNPP3	ENSG00000213344	processed_pseudogene	10.8394	1.26611	0.426459	2.96889	0.00298878
SPRR1A	ENSG00000169474	protein_coding	27591.2	1.26586	0.482854	2.62163	0.00875109
AL049649.1	ENSG00000230990	lncRNA	13.8533	1.2654	0.430023	2.94264	0.00325426
ZNF816-ZNF321P	ENSG00000221874	protein_coding	0.545639	1.26485	0.629126	2.01049	0.044379
OXCT2P1	ENSG00000237624	unprocessed_pseudogene	21.5049	1.26269	0.306149	4.12441	3.72e-05
B3GNT3	ENSG00000179913	protein_coding	1193.58	1.26244	0.337012	3.74599	0.000179681
TGM1	ENSG00000092295	protein_coding	17844.5	1.26229	0.444923	2.8371	0.0045526
ADAMTSL5	ENSG00000185761	protein_coding	1219.98	1.25934	0.247044	5.09764	3.44e-07
PLP1	ENSG00000123560	protein_coding	95.7898	1.25927	0.45962	2.7398	0.00614766
CDH19	ENSG00000071991	protein_coding	269.814	1.25883	0.470248	2.67695	0.00742948
LINC01833	ENSG00000259439	lncRNA	64.3617	1.25822	0.506933	2.48203	0.0130637
RPL41P1	ENSG00000227063	processed_pseudogene	135.064	1.2521	0.351828	3.55885	0.000372479
PCDHGC5	ENSG00000240764	protein_coding	440.998	1.24765	0.404844	3.08179	0.00205757
TACR2	ENSG00000075073	protein_coding	456.444	1.24707	0.421307	2.96	0.00307644
MFAP5	ENSG00000197614	protein_coding	1540.38	1.24499	0.341382	3.64692	0.000265407
MALL	ENSG00000144063	protein_coding	1426.55	1.24357	0.317677	3.91459	9.06e-05
PRMT8	ENSG00000111218	protein_coding	39.1417	1.24098	0.474136	2.61735	0.00886147
LCE5A	ENSG00000186207	protein_coding	3.82639	1.23946	0.515267	2.40548	0.0161512
SIX2	ENSG00000170577	protein_coding	781.809	1.23909	0.421201	2.9418	0.00326311
RNF224	ENSG00000233198	protein_coding	42.4225	1.23874	0.319143	3.88146	0.00010383
LVRN	ENSG00000172901	protein_coding	57.2165	1.23785	0.394815	3.13526	0.001717
C1QTNF12	ENSG00000184163	protein_coding	613.87	1.23752	0.37403	3.30861	0.000937603
FP236383.1	ENSG00000274868	misc_RNA	5.54136	1.23618	0.625591	1.97603	0.0481518
M1AP	ENSG00000159374	protein_coding	212.707	1.23556	0.478252	2.5835	0.00978047
NEU2	ENSG00000115488	protein_coding	7.89338	1.2349	0.501112	2.46432	0.0137273
LINC00636	ENSG00000240423	lncRNA	5.22852	1.2348	0.413345	2.98733	0.00281426
ECRG4	ENSG00000119147	protein_coding	122.917	1.23389	0.513626	2.40232	0.0162915
PROSER2-AS1	ENSG00000225778	lncRNA	64.9519	1.2328	0.258661	4.7661	1.88e-06
RORB-AS1	ENSG00000224825	lncRNA	2.39219	1.23258	0.524012	2.3522	0.018663
CTCFL	ENSG00000124092	protein_coding	23.9188	1.22829	0.56689	2.16671	0.030257
GTF2IP7	ENSG00000227038	transcribed_unprocessed_pseudogene	64.6147	1.2282	0.365745	3.35808	0.000784858
GPR39	ENSG00000183840	protein_coding	205.299	1.22726	0.350634	3.5001	0.000465076
AC010327.4	ENSG00000267577	lncRNA	11.1547	1.22603	0.430308	2.84919	0.00438313
LCN6	ENSG00000267206	protein_coding	7.48296	1.22496	0.416536	2.94082	0.00327343
LRRC37A6P	ENSG00000230445	transcribed_processed_pseudogene	130.989	1.22493	0.343446	3.56658	0.000361668
JPH2	ENSG00000149596	protein_coding	1387.28	1.22422	0.421445	2.90481	0.00367473
ACP7	ENSG00000183760	protein_coding	303.844	1.22363	0.375355	3.25992	0.00111446
AC007731.2	ENSG00000235578	lncRNA	1.2795	1.22084	0.541046	2.25645	0.0240424
BCAS2P1	ENSG00000255051	processed_pseudogene	10.5406	1.22019	0.590574	2.06611	0.038818
SPRR2G	ENSG00000159516	protein_coding	1826.32	1.21979	0.535563	2.27758	0.0227517
RAB11FIP1	ENSG00000156675	protein_coding	9352.54	1.21859	0.319682	3.81187	0.000137918
AP000892.4	ENSG00000280143	TEC	428.877	1.2171	0.351346	3.46412	0.000531973
AC007003.1	ENSG00000231183	lncRNA	1.49086	1.21493	0.574099	2.11624	0.0343241
AC093904.2	ENSG00000242136	lncRNA	32.5575	1.21461	0.359308	3.38042	0.000723757
IL31RA	ENSG00000164509	protein_coding	292.351	1.21405	0.390731	3.10712	0.00188918
TGM2	ENSG00000198959	protein_coding	11660.7	1.2136	0.325012	3.734	0.000188461
MIR137HG	ENSG00000225206	lncRNA	22.1663	1.21208	0.54436	2.22661	0.0259731
TPPP3	ENSG00000159713	protein_coding	2155.76	1.21207	0.299403	4.04828	5.16e-05
UPK3B	ENSG00000243566	protein_coding	976.063	1.21116	0.405968	2.98338	0.00285085
CLEC4G	ENSG00000182566	protein_coding	15.4272	1.21068	0.377828	3.20433	0.00135377
LINC01338	ENSG00000281327	lncRNA	13.4324	1.20874	0.352154	3.43242	0.000598225
CPA4	ENSG00000128510	protein_coding	2068.1	1.20839	0.451609	2.67574	0.00745656
HAS1	ENSG00000105509	protein_coding	59.5596	1.20622	0.366187	3.294	0.00098774
CADM3-AS1	ENSG00000225670	lncRNA	21.0846	1.20545	0.467428	2.5789	0.00991167
AC073957.1	ENSG00000225146	lncRNA	32.6303	1.20289	0.457058	2.6318	0.00849332
ISM2	ENSG00000100593	protein_coding	61.6806	1.20254	0.357792	3.361	0.000776619
CCDC68	ENSG00000166510	protein_coding	280.612	1.20199	0.324256	3.7069	0.000209809
PRR20G	ENSG00000239620	protein_coding	13.9806	1.19994	0.463516	2.58878	0.00963158
HMCN2	ENSG00000148357	protein_coding	600.152	1.1986	0.375479	3.1922	0.00141193
TPTEP1	ENSG00000100181	transcribed_unprocessed_pseudogene	282.178	1.19533	0.331784	3.60275	0.000314873
RN7SL429P	ENSG00000278604	misc_RNA	0.930286	1.19533	0.451299	2.64865	0.00808141
AC010385.1	ENSG00000226400	processed_pseudogene	1.00757	1.19425	0.579272	2.06164	0.0392424
RTP3	ENSG00000163825	protein_coding	27.8487	1.18775	0.603305	1.96873	0.048984
SLC6A1-AS1	ENSG00000232287	lncRNA	1.31693	1.18766	0.506179	2.34632	0.0189596
TUBAL3	ENSG00000178462	protein_coding	66.3051	1.18693	0.345987	3.43055	0.000602351
AC003092.1	ENSG00000236453	lncRNA	8.02165	1.18615	0.455032	2.60673	0.00914102
CSPG4P13	ENSG00000260139	transcribed_unprocessed_pseudogene	51.6396	1.18587	0.382265	3.10221	0.00192081
AL357033.3	ENSG00000276317	lncRNA	26.2871	1.18532	0.304723	3.88982	0.000100319
PCDHA4	ENSG00000204967	protein_coding	62.1721	1.18371	0.506361	2.33767	0.0194041
AC092143.2	ENSG00000259006	lncRNA	1.34275	1.18282	0.49756	2.37725	0.0174423
AL353997.2	ENSG00000264177	lncRNA	44.5364	1.18119	0.386669	3.05478	0.00225227
ZBTB45P1	ENSG00000225108	processed_pseudogene	6.64724	1.18085	0.33213	3.55538	0.00037743
ASB5	ENSG00000164122	protein_coding	108.522	1.17948	0.590326	1.99802	0.0457148
CEACAM5	ENSG00000105388	protein_coding	13696.7	1.17907	0.497251	2.37118	0.0177316
LINC00705	ENSG00000225269	lncRNA	11.0341	1.17875	0.409353	2.87955	0.00398242
MMP13	ENSG00000137745	protein_coding	5798.5	1.17859	0.519049	2.27068	0.0231662
AP001858.1	ENSG00000253547	processed_pseudogene	0.975021	1.17701	0.494911	2.37822	0.0173964
TRABD2A	ENSG00000186854	protein_coding	190.8	1.1765	0.317798	3.70202	0.00021389
AC068647.2	ENSG00000250271	transcribed_unprocessed_pseudogene	61.8646	1.17373	0.5221	2.2481	0.0245696
LINC02148	ENSG00000250427	lncRNA	2.31899	1.17303	0.358884	3.26855	0.001081
FHL1	ENSG00000022267	protein_coding	4715.1	1.17271	0.354247	3.31042	0.000931547
SLC6A2	ENSG00000103546	protein_coding	275.206	1.1722	0.38896	3.01368	0.002581
TTLL11-IT1	ENSG00000237548	lncRNA	20.3721	1.17211	0.427959	2.73883	0.00616587
AP001324.3	ENSG00000279353	TEC	7.91514	1.1701	0.366108	3.19605	0.00139321
GALNT15	ENSG00000131386	protein_coding	380.739	1.16995	0.317446	3.68551	0.000228247
HSPB7	ENSG00000173641	protein_coding	987.286	1.16944	0.443499	2.63685	0.00836792
AC004817.3	ENSG00000269927	lncRNA	19.6368	1.16805	0.327344	3.56825	0.000359371
NPTX1	ENSG00000171246	protein_coding	228.93	1.16737	0.407415	2.8653	0.00416619
LINC02487	ENSG00000203688	lncRNA	191.599	1.16736	0.585641	1.9933	0.0462283
RRAD	ENSG00000166592	protein_coding	1994.85	1.1673	0.414817	2.814	0.00489293
AC037450.1	ENSG00000253171	lncRNA	1.31968	1.16443	0.545703	2.13382	0.0328571
AC096711.2	ENSG00000251555	lncRNA	2.58229	1.16348	0.591992	1.96537	0.0493717
RASL11A	ENSG00000122035	protein_coding	409.035	1.16302	0.334281	3.47916	0.000502991
P3H2-AS1	ENSG00000225764	lncRNA	34.244	1.15874	0.398932	2.90461	0.00367715
UPK1A	ENSG00000105668	protein_coding	96.9322	1.15704	0.472554	2.44849	0.0143457
CNTNAP1	ENSG00000108797	protein_coding	1372.69	1.15636	0.282553	4.09255	4.27e-05
AC068446.2	ENSG00000247765	lncRNA	1.66658	1.15077	0.502032	2.29223	0.0218923
ATG9B	ENSG00000181652	protein_coding	910.462	1.14779	0.381754	3.00663	0.00264163
SSTR5	ENSG00000162009	protein_coding	43.6382	1.14709	0.485981	2.36035	0.0182578
KLHL30	ENSG00000168427	protein_coding	40.6432	1.14689	0.319549	3.58907	0.000331855
ALOX12B	ENSG00000179477	protein_coding	1600.94	1.1466	0.426625	2.6876	0.00719673
GAP43	ENSG00000172020	protein_coding	138.556	1.14547	0.342632	3.34314	0.000828359
AFAP1L1	ENSG00000157510	protein_coding	1313.01	1.14506	0.210455	5.44088	5.3e-08
BAIAP2L2	ENSG00000128298	protein_coding	1021.6	1.14452	0.277062	4.1309	3.61e-05
MORN5	ENSG00000185681	protein_coding	7.34823	1.14337	0.514145	2.22383	0.0261601
GALR2	ENSG00000182687	protein_coding	68.7761	1.14236	0.346779	3.2942	0.00098702
WFDC12	ENSG00000168703	protein_coding	246.355	1.14051	0.554162	2.05809	0.0395819
KRT6C	ENSG00000170465	protein_coding	59196.2	1.13864	0.496496	2.29336	0.0218274
LINC01160	ENSG00000231346	lncRNA	156.973	1.13687	0.411083	2.76555	0.0056827
BMP6	ENSG00000153162	protein_coding	311.957	1.1345	0.309101	3.67033	0.000242235
ZNF536	ENSG00000198597	protein_coding	59.3139	1.13264	0.421348	2.68814	0.00718517
AC011483.1	ENSG00000267879	lncRNA	18.6654	1.132	0.427216	2.64971	0.00805618
EVA1A	ENSG00000115363	protein_coding	522.183	1.13095	0.333134	3.39486	0.000686629
MTND4P20	ENSG00000233377	processed_pseudogene	29.9299	1.1297	0.494206	2.28588	0.0222611
RTL3	ENSG00000179300	protein_coding	11.7043	1.12932	0.388305	2.90834	0.00363351
AQP10	ENSG00000143595	protein_coding	14.9743	1.12917	0.36501	3.09353	0.00197788
LINC00269	ENSG00000215162	lncRNA	1.4692	1.12839	0.502267	2.24659	0.0246659
DISP2	ENSG00000140323	protein_coding	282.822	1.1278	0.303404	3.71715	0.000201481
AL627231.1	ENSG00000213489	processed_pseudogene	1.02941	1.12649	0.438181	2.57082	0.0101457
BCAR3	ENSG00000137936	protein_coding	2712.33	1.12609	0.21771	5.17243	2.31e-07
OASL	ENSG00000135114	protein_coding	2765.68	1.12222	0.376617	2.97973	0.00288499
ANGPTL1	ENSG00000116194	protein_coding	285.062	1.12125	0.449974	2.49181	0.0127095
HBA1	ENSG00000206172	protein_coding	52.4436	1.12057	0.358946	3.12185	0.0017972
PCDHGA10	ENSG00000253846	protein_coding	700.524	1.12046	0.371642	3.0149	0.00257062
ADAMTSL3	ENSG00000156218	protein_coding	413.738	1.11825	0.400936	2.7891	0.00528549
FUT6	ENSG00000156413	protein_coding	856.591	1.11756	0.532355	2.09927	0.035793
AC004585.1	ENSG00000266088	lncRNA	43.8761	1.11655	0.30301	3.68486	0.000228828
AL359955.1	ENSG00000197550	unprocessed_pseudogene	3.93744	1.1148	0.489792	2.27607	0.0228416
AC006058.4	ENSG00000280435	TEC	23.3034	1.11373	0.423076	2.63246	0.0084769
INPP4B	ENSG00000109452	protein_coding	1968.8	1.11326	0.261863	4.25131	2.13e-05
GRM5-AS1	ENSG00000255082	lncRNA	1.98625	1.11201	0.525511	2.11605	0.0343408
GPIHBP1	ENSG00000277494	protein_coding	43.4252	1.11139	0.365908	3.03735	0.00238666
AC010776.2	ENSG00000267774	lncRNA	2.9271	1.11026	0.510904	2.17314	0.0297699
DKK1	ENSG00000107984	protein_coding	2064.21	1.10991	0.374649	2.96255	0.00305106
CAPN5	ENSG00000149260	protein_coding	1662.27	1.1097	0.283516	3.91407	9.08e-05
HNRNPA1P52	ENSG00000269119	processed_pseudogene	19.7456	1.10948	0.341809	3.2459	0.0011708
AC021028.1	ENSG00000226659	lncRNA	28.0759	1.10857	0.332877	3.33028	0.000867599
P3H2	ENSG00000090530	protein_coding	6387.8	1.10814	0.329917	3.35884	0.000782694
ASPRV1	ENSG00000244617	protein_coding	297.178	1.10461	0.383212	2.88249	0.00394542
AL355102.2	ENSG00000258691	protein_coding	11.1672	1.1042	0.374656	2.94723	0.00320639
STAC	ENSG00000144681	protein_coding	312.132	1.10389	0.344925	3.20039	0.00137243
KLK12	ENSG00000186474	protein_coding	1333.4	1.10293	0.525952	2.09702	0.0359916
AC010343.3	ENSG00000250697	lncRNA	85.4002	1.10157	0.561589	1.96153	0.0498172
FAM25C	ENSG00000276430	protein_coding	11.111	1.10152	0.498817	2.20826	0.0272261
THBS1	ENSG00000137801	protein_coding	34825.2	1.10151	0.256781	4.28968	1.79e-05
UBXN10	ENSG00000162543	protein_coding	177.629	1.10133	0.37938	2.90298	0.00369627
SYNPO2L	ENSG00000166317	protein_coding	100.102	1.09965	0.400526	2.74552	0.00604149
SLC35G3	ENSG00000164729	protein_coding	10.1204	1.09788	0.493807	2.2233	0.0261954
KLK13	ENSG00000167759	protein_coding	6911.77	1.09779	0.511182	2.14755	0.0317498
MGAT5B	ENSG00000167889	protein_coding	163.429	1.09701	0.362538	3.02592	0.00247876
WDR87	ENSG00000171804	protein_coding	13.0418	1.09591	0.387588	2.82752	0.00469107
CREG2	ENSG00000175874	protein_coding	604.086	1.09587	0.400649	2.73523	0.00623373
OXTR	ENSG00000180914	protein_coding	147.094	1.09249	0.256564	4.25816	2.06e-05
MIR5188	ENSG00000265345	miRNA	3.70193	1.09196	0.467266	2.33691	0.0194441
CXCL11	ENSG00000169248	protein_coding	831.353	1.09166	0.422724	2.58244	0.0098104
CLIC3	ENSG00000169583	protein_coding	3170.47	1.08936	0.421833	2.58244	0.00981042
KCNMA1	ENSG00000156113	protein_coding	3662.92	1.08274	0.408344	2.65155	0.00801236
MT1E	ENSG00000169715	protein_coding	4152.57	1.08269	0.342796	3.1584	0.00158639
NPR1	ENSG00000169418	protein_coding	330.863	1.0824	0.260587	4.15372	3.27e-05
AL512274.1	ENSG00000261068	lncRNA	1310.37	1.0821	0.362086	2.98853	0.00280323
PLEK2	ENSG00000100558	protein_coding	3031.22	1.08173	0.29215	3.70265	0.000213358
RSAD2	ENSG00000134321	protein_coding	3028.49	1.08173	0.349246	3.09733	0.0019527
CXCL5	ENSG00000163735	protein_coding	622.308	1.08136	0.417726	2.58869	0.00963414
AC078993.1	ENSG00000238178	lncRNA	29.1373	1.08057	0.449836	2.40215	0.0162988
CYP26B1	ENSG00000003137	protein_coding	1637.31	1.07863	0.362093	2.97888	0.00289304
LIPH	ENSG00000163898	protein_coding	1088.44	1.07849	0.323027	3.3387	0.000841717
GBX2	ENSG00000168505	protein_coding	47.4255	1.07784	0.359651	2.9969	0.00272743
CEMIP	ENSG00000103888	protein_coding	4209.97	1.07694	0.276052	3.90123	9.57e-05
SNORA80B	ENSG00000206633	snoRNA	18.4516	1.07639	0.408787	2.63314	0.00845991
PDE11A	ENSG00000128655	protein_coding	76.495	1.07388	0.399834	2.68582	0.00723525
PTPRH	ENSG00000080031	protein_coding	502.354	1.07297	0.361424	2.96872	0.00299044
U82695.1	ENSG00000224963	transcribed_unitary_pseudogene	8.15526	1.07291	0.37887	2.83187	0.0046276
TNFRSF8	ENSG00000120949	protein_coding	154.502	1.07235	0.332352	3.22654	0.00125296
CHD5	ENSG00000116254	protein_coding	67.3029	1.07198	0.374883	2.8595	0.00424311
AC006058.3	ENSG00000272121	lncRNA	8.19341	1.06939	0.48608	2.20004	0.027804
SHISAL1	ENSG00000138944	protein_coding	814.543	1.06879	0.370621	2.88378	0.00392931
AC097637.1	ENSG00000173366	protein_coding	0.823564	1.06825	0.502905	2.12415	0.0336572
IGLV7-43	ENSG00000211652	IG_V_gene	125.902	1.06817	0.508305	2.10143	0.0356029
AL591379.1	ENSG00000182021	transcribed_unprocessed_pseudogene	2.67941	1.06388	0.371679	2.86236	0.00420504
PAEP	ENSG00000122133	protein_coding	47.2954	1.06308	0.505309	2.10382	0.0353943
ANGPTL4	ENSG00000167772	protein_coding	2067.65	1.05931	0.32834	3.22626	0.0012542
RAET1G	ENSG00000203722	protein_coding	481.444	1.05824	0.374427	2.82629	0.00470905
PNMA5	ENSG00000198883	protein_coding	8.95068	1.05528	0.429261	2.45836	0.0139571
HBA2	ENSG00000188536	protein_coding	468.566	1.05495	0.368094	2.86599	0.00415704
COBL	ENSG00000106078	protein_coding	1327.5	1.05491	0.383699	2.74931	0.00597215
SRPX	ENSG00000101955	protein_coding	1052.57	1.05468	0.294871	3.57675	0.000347891
C8orf74	ENSG00000171060	protein_coding	11.5871	1.05324	0.39799	2.64641	0.00813522
AL161645.1	ENSG00000278518	lncRNA	17.885	1.05229	0.480187	2.19141	0.0284223
AF279873.3	ENSG00000253642	lncRNA	5.33509	1.05211	0.526954	1.99659	0.0458695
LRRC8A	ENSG00000136802	protein_coding	22832.8	1.052	0.203204	5.17708	2.25e-07
HAL	ENSG00000084110	protein_coding	103.303	1.05196	0.369764	2.84495	0.00444179
SH3TC2	ENSG00000169247	protein_coding	311.65	1.05163	0.296384	3.54821	0.00038786
SLC9A2	ENSG00000115616	protein_coding	720.433	1.0499	0.41653	2.52059	0.0117157
PLA2G4D	ENSG00000159337	protein_coding	248.334	1.04911	0.397981	2.63607	0.00838733
AC023796.2	ENSG00000256482	lncRNA	2.70373	1.04894	0.455936	2.30062	0.0214129
LRRC15	ENSG00000172061	protein_coding	2152.08	1.04856	0.420512	2.49354	0.0126475
PDCD6IPP1	ENSG00000275325	transcribed_unprocessed_pseudogene	26.453	1.04823	0.283556	3.69673	0.000218397
FBN2	ENSG00000138829	protein_coding	4375.73	1.04769	0.449752	2.32948	0.0198335
MT1JP	ENSG00000255986	transcribed_unprocessed_pseudogene	3.03422	1.04662	0.460725	2.27169	0.0231053
ENKUR	ENSG00000151023	protein_coding	102.042	1.04647	0.354352	2.95318	0.00314517
FEZ1	ENSG00000149557	protein_coding	1387.92	1.04625	0.245003	4.27036	1.95e-05
CNN1	ENSG00000130176	protein_coding	5187.47	1.04405	0.437149	2.38832	0.0169254
IGHE	ENSG00000211891	IG_C_gene	46.2168	1.04379	0.405711	2.57273	0.0100899
BX322234.2	ENSG00000233085	lncRNA	13.1785	1.04011	0.44978	2.31248	0.0207515
CYP27B1	ENSG00000111012	protein_coding	503.1	1.0399	0.287844	3.61274	0.000302979
ACTG2	ENSG00000163017	protein_coding	16571.4	1.03974	0.462167	2.24971	0.0244674
RNASE10	ENSG00000182545	protein_coding	235.437	1.03923	0.488575	2.12707	0.033414
ADAMTS8	ENSG00000134917	protein_coding	200.923	1.03736	0.419398	2.47344	0.0133819
AL079303.1	ENSG00000258661	lncRNA	119.277	1.03686	0.43598	2.37823	0.0173961
FKBP1B	ENSG00000119782	protein_coding	254.588	1.03635	0.216284	4.79159	1.65e-06
AC089987.2	ENSG00000258121	lncRNA	17.4049	1.03634	0.396847	2.61145	0.00901601
KCNJ12	ENSG00000184185	protein_coding	188.616	1.03624	0.356299	2.90834	0.00363355
CYP2C9	ENSG00000138109	protein_coding	89.3698	1.03567	0.477846	2.16736	0.0302074
LINC02577	ENSG00000228742	lncRNA	327.323	1.03465	0.428184	2.41637	0.0156762
LCA10	ENSG00000273769	lncRNA	1.59477	1.03461	0.503185	2.05611	0.0397716
LHX9	ENSG00000143355	protein_coding	29.3991	1.03454	0.429872	2.40661	0.0161012
AP002761.4	ENSG00000260401	lncRNA	1778.61	1.0341	0.319187	3.23978	0.00119621
SRMS	ENSG00000125508	protein_coding	82.6881	1.03184	0.37444	2.75568	0.00585707
AL049775.2	ENSG00000258902	lncRNA	4.4181	1.03145	0.382762	2.69476	0.00704393
AC091045.1	ENSG00000259536	lncRNA	40.0536	1.0298	0.332943	3.09302	0.00198133
AL136982.6	ENSG00000272508	lncRNA	30.8731	1.02972	0.409247	2.51615	0.0118646
ST6GALNAC1	ENSG00000070526	protein_coding	716.714	1.02877	0.389277	2.64277	0.00822302
PROCR	ENSG00000101000	protein_coding	1463.64	1.02864	0.203115	5.06434	4.1e-07
ITGA3	ENSG00000005884	protein_coding	38768	1.0274	0.238941	4.29979	1.71e-05
AC078923.1	ENSG00000258077	lncRNA	41.6504	1.02659	0.442498	2.31998	0.0203421
DISP3	ENSG00000204624	protein_coding	58.3797	1.02613	0.404986	2.53374	0.0112853
LINC01269	ENSG00000258689	lncRNA	85.1064	1.02469	0.445575	2.29972	0.0214644
AC093904.4	ENSG00000261104	lncRNA	103.233	1.02404	0.367442	2.78694	0.00532079
RNF222	ENSG00000189051	protein_coding	336.181	1.02401	0.450345	2.27383	0.022976
FER1L6	ENSG00000214814	protein_coding	441.997	1.02386	0.446095	2.29516	0.0217238
FGFBP1	ENSG00000137440	protein_coding	14663	1.02279	0.305572	3.34714	0.000816494
TRPM6	ENSG00000119121	protein_coding	140.621	1.02272	0.313313	3.26422	0.00109765
TDRD10	ENSG00000163239	protein_coding	50.9032	1.022	0.357715	2.85704	0.00427618
MAMDC2	ENSG00000165072	protein_coding	598.288	1.02154	0.38559	2.64928	0.00806628
SYTL5	ENSG00000147041	protein_coding	278.919	1.02146	0.424	2.4091	0.0159917
AC090409.1	ENSG00000267279	lncRNA	34.3306	1.02066	0.331287	3.0809	0.00206376
CD38	ENSG00000004468	protein_coding	1670.75	1.01844	0.332578	3.06227	0.00219667
SNORA70	ENSG00000251893	snoRNA	9.31562	1.0174	0.455373	2.23421	0.0254691
AL589843.1	ENSG00000224848	lncRNA	27.3742	1.01456	0.324721	3.12442	0.00178157
ONECUT1	ENSG00000169856	protein_coding	8.85811	1.01455	0.377236	2.68944	0.00715718
PCDHB11	ENSG00000197479	protein_coding	636.124	1.01453	0.295428	3.43411	0.000594511
F3	ENSG00000117525	protein_coding	4724.99	1.01266	0.291135	3.47833	0.000504556
EFNA2	ENSG00000099617	protein_coding	16.1456	1.01113	0.330586	3.0586	0.00222375
ZNF280B	ENSG00000275004	protein_coding	110.183	1.0111	0.385585	2.62225	0.00873503
DPP4-DT	ENSG00000230918	lncRNA	3.74925	1.01106	0.473793	2.13398	0.0328447
CKB	ENSG00000166165	protein_coding	4932.07	1.00989	0.275413	3.66682	0.000245586
RGS20	ENSG00000147509	protein_coding	559.359	1.00966	0.301309	3.35091	0.000805471
LRRC38	ENSG00000162494	protein_coding	90.7728	1.00916	0.443648	2.27468	0.0229254
CTNNA3	ENSG00000183230	protein_coding	88.9643	1.00887	0.51349	1.96473	0.0494454
SAMD4A	ENSG00000020577	protein_coding	1529.27	1.00882	0.257233	3.92183	8.79e-05
COL11A1	ENSG00000060718	protein_coding	5350.68	1.00711	0.450687	2.23461	0.0254431
TLL2	ENSG00000095587	protein_coding	99.7186	1.00695	0.36511	2.75794	0.00581661
GCGR	ENSG00000215644	protein_coding	34.9462	1.00695	0.41777	2.41029	0.01594
TENM3-AS1	ENSG00000177822	lncRNA	141.557	1.00651	0.382459	2.63168	0.00849633
RHOF	ENSG00000139725	protein_coding	295.537	1.00623	0.221947	4.53364	5.8e-06
F13A1	ENSG00000124491	protein_coding	1302.49	1.00145	0.35744	2.80173	0.00508292
